# Supplementary material for: Folate deficiency drives mitotic missegregation of the human FRAXA locus
Source: PubMed Central journal article supplement (PMC6304931; doi:10.1073/pnas.1808377115), 2018-12-03

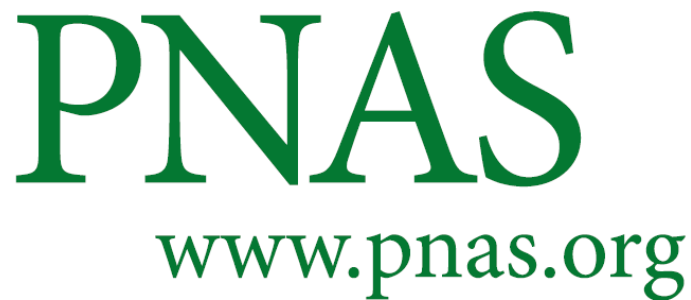

**Folate deficiency drives mitotic missegregation of the human *FRAXA* locus**

Victoria A. Bjerregaard, Lorenza Garribba, Cynthia T. McMurray, Ian D. Hickson, and Ying Liu

Corresponding author: Ying Liu  
Email: [ying@sund.ku.dk](mailto:ying@sund.ku.dk)

**This PDF file includes:**

**Dataset S1: The output of the FMR1 CGG sizing PCR capillary electrophoresis in all of the samples analyzed (26 pages in total).** The results and nature of the samples are summarized in Table S1.

| Sample File      | Sample Name | Panel        | OS                                   | SQ                                   |
|------------------|-------------|--------------|--------------------------------------|--------------------------------------|
| 6-65-PM1 A09.fsa | 6-65-PM1    | R62 150-1500 | <span style="color: green;">■</span> | <span style="color: green;">■</span> |

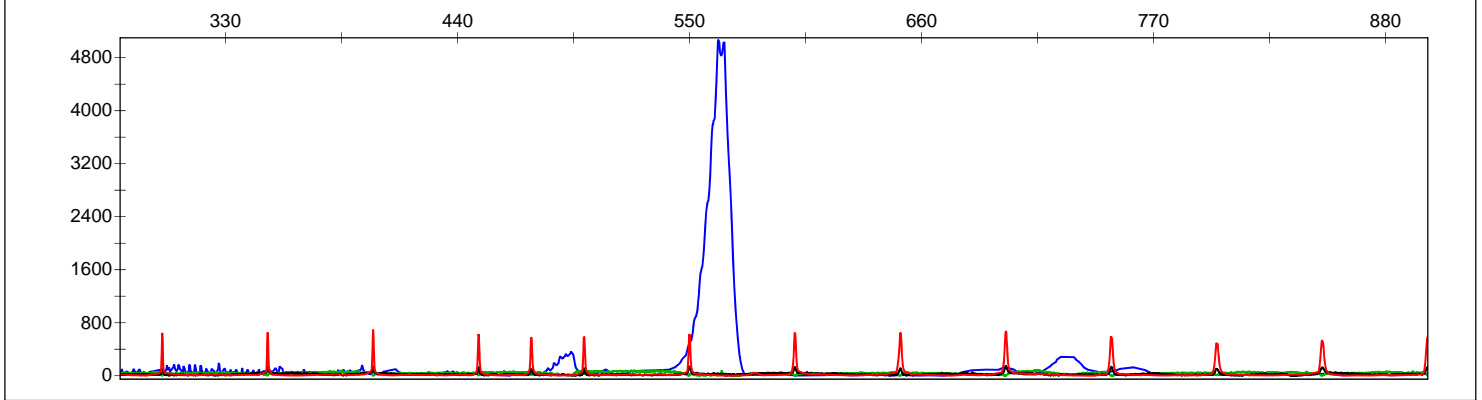

| Sample File      | Sample Name | Panel        | OS                                   | SQ                                   |
|------------------|-------------|--------------|--------------------------------------|--------------------------------------|
| 6-66-PM2 B09.fsa | 6-66-PM2    | R62 150-1500 | <span style="color: green;">■</span> | <span style="color: green;">■</span> |

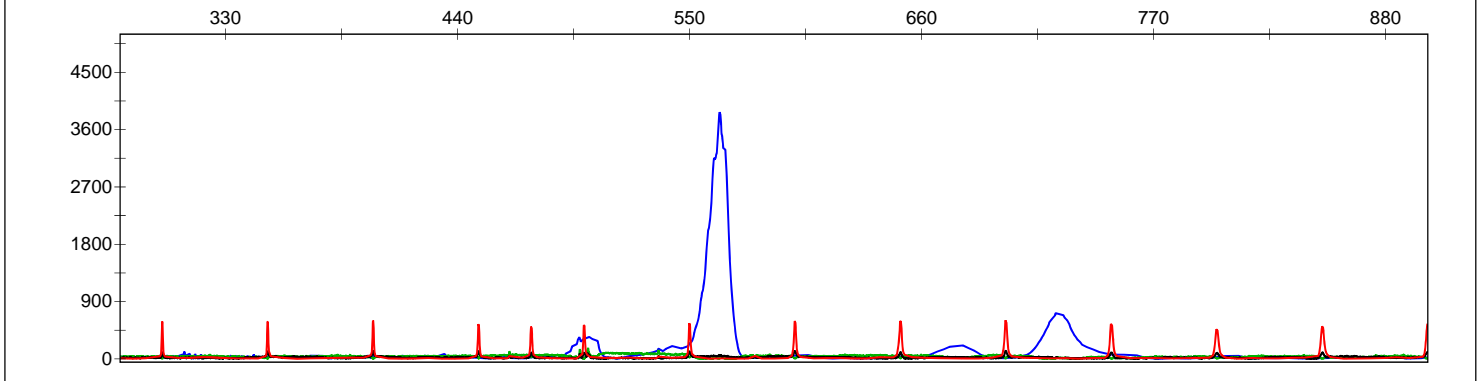

| Sample File      | Sample Name | Panel        | OS                                   | SQ                                   |
|------------------|-------------|--------------|--------------------------------------|--------------------------------------|
| 6-67-PM3 C09.fsa | 6-67-PM3    | R62 150-1500 | <span style="color: green;">■</span> | <span style="color: green;">■</span> |

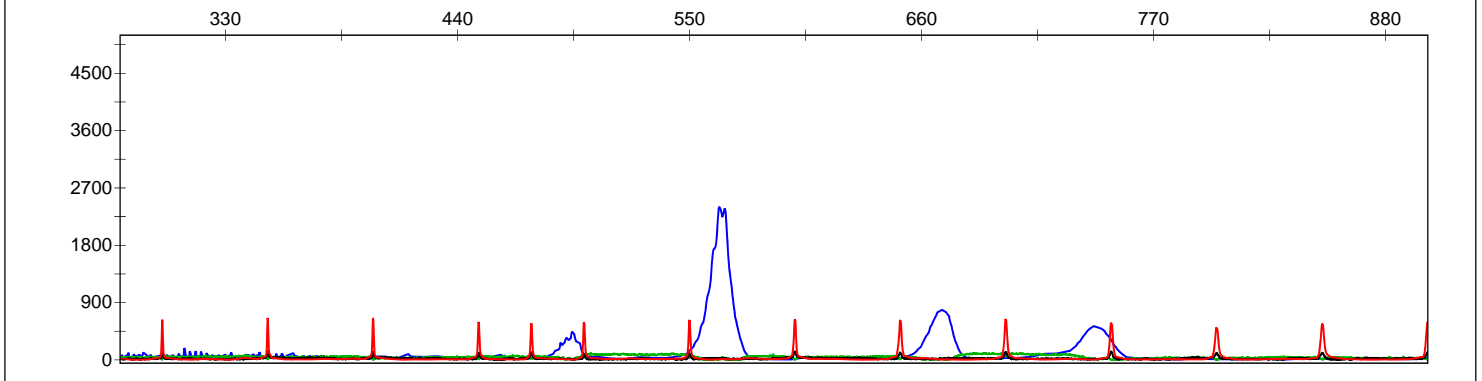

| Sample File      | Sample Name | Panel        | OS                                   | SQ                                   |
|------------------|-------------|--------------|--------------------------------------|--------------------------------------|
| 6-68-PM4 D09.fsa | 6-68-PM4    | R62 150-1500 | <span style="color: green;">■</span> | <span style="color: green;">■</span> |

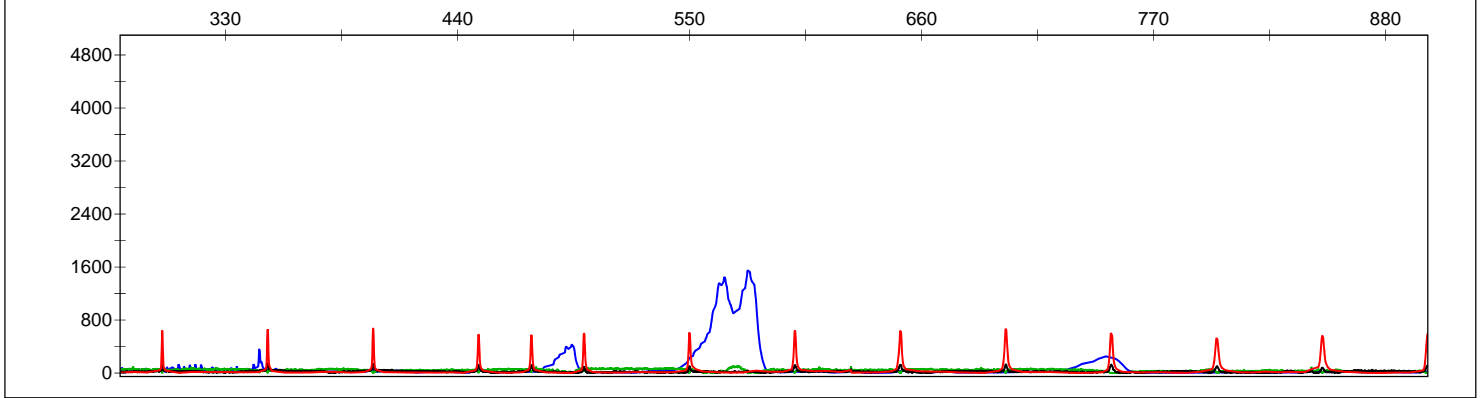

| Sample File      | Sample Name | Panel        | OS                                   | SQ                                   |
|------------------|-------------|--------------|--------------------------------------|--------------------------------------|
| 6-69-PM5 E09.fsa | 6-69-PM5    | R62 150-1500 | <span style="color: green;">■</span> | <span style="color: green;">■</span> |

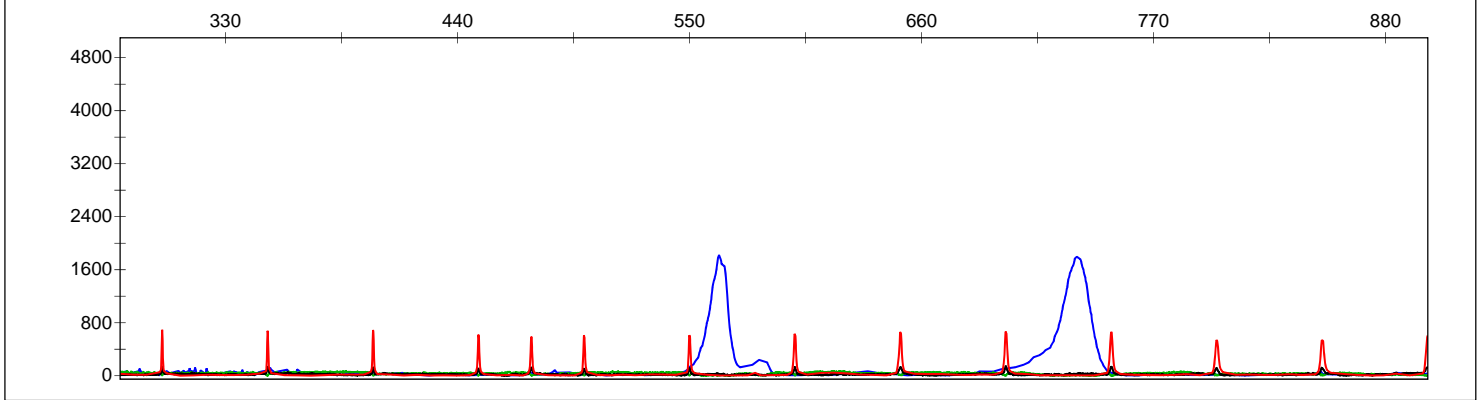

| Sample File      | Sample Name | Panel        | OS                                   | SQ                                   |
|------------------|-------------|--------------|--------------------------------------|--------------------------------------|
| 6-70-PM6 F09.fsa | 6-70-PM6    | R62 150-1500 | <span style="color: green;">■</span> | <span style="color: green;">■</span> |

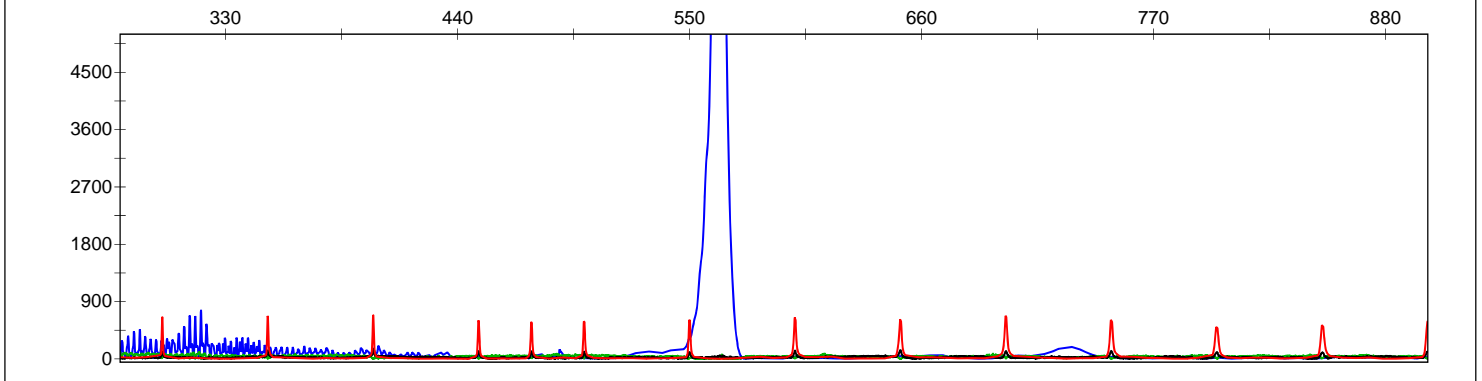

| Sample File      | Sample Name | Panel        | OS                                   | SQ                                   |
|------------------|-------------|--------------|--------------------------------------|--------------------------------------|
| 6-71-PM7 G09.fsa | 6-71-PM7    | R62 150-1500 | <span style="color: green;">■</span> | <span style="color: green;">■</span> |

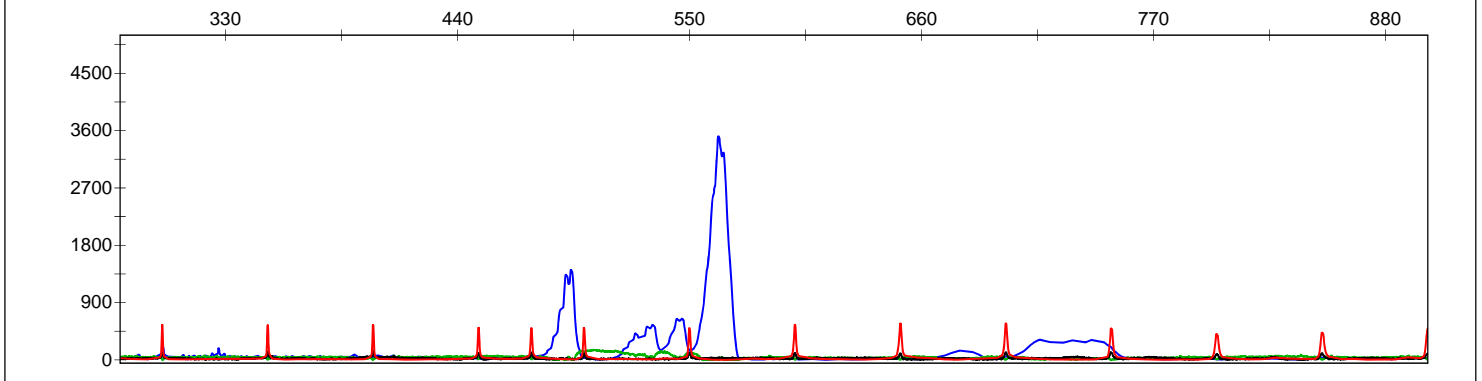

| Sample File      | Sample Name | Panel        | OS                                   | SQ                                   |
|------------------|-------------|--------------|--------------------------------------|--------------------------------------|
| 6-72-PM8 H09.fsa | 6-72-PM8    | R62 150-1500 | <span style="color: green;">■</span> | <span style="color: green;">■</span> |

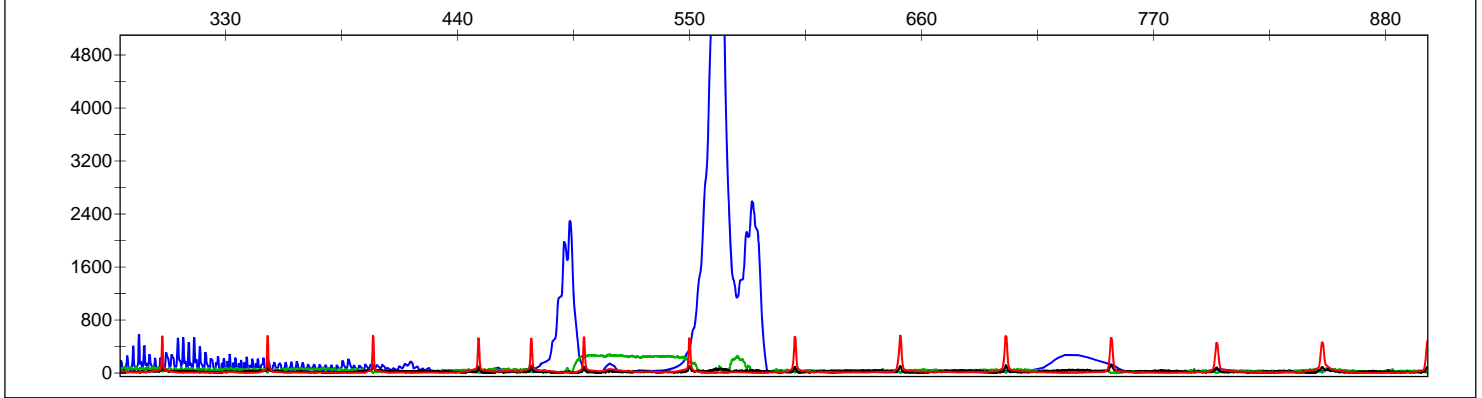

| Sample File      | Sample Name | Panel        | OS                                   | SQ                                   |
|------------------|-------------|--------------|--------------------------------------|--------------------------------------|
| 7-01-PM9 A01.fsa | 7-01-PM9    | R62 150-1500 | <span style="color: green;">■</span> | <span style="color: green;">■</span> |

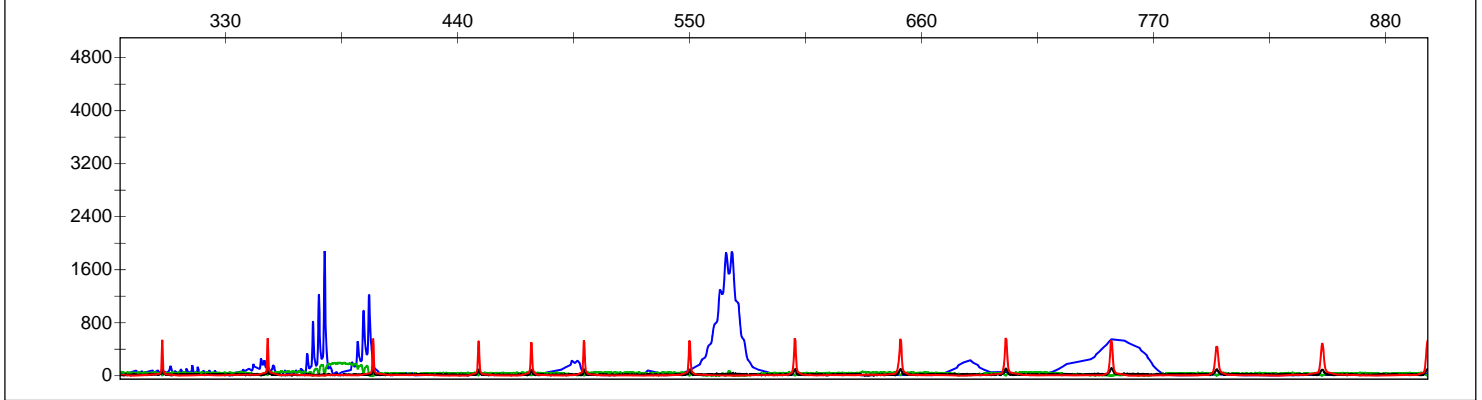

| Sample File       | Sample Name | Panel        | OS                                   | SQ                                   |
|-------------------|-------------|--------------|--------------------------------------|--------------------------------------|
| 7-02-PM10 B01.fsa | 7-02-PM10   | R62 150-1500 | <span style="color: green;">■</span> | <span style="color: green;">■</span> |

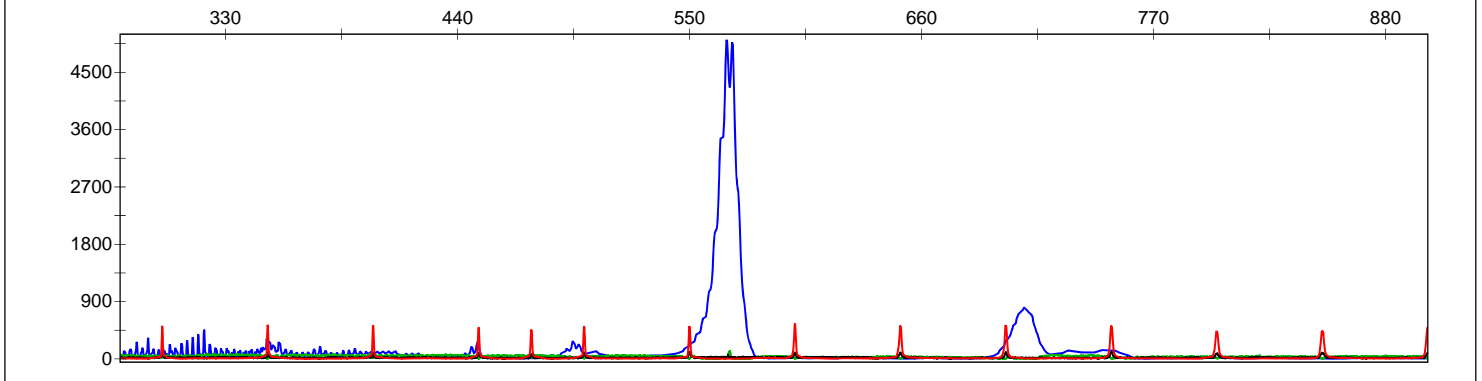

| Sample File       | Sample Name | Panel        | OS                                   | SQ                                   |
|-------------------|-------------|--------------|--------------------------------------|--------------------------------------|
| 7-03-PM11 C01.fsa | 7-03-PM11   | R62 150-1500 | <span style="color: green;">■</span> | <span style="color: green;">■</span> |

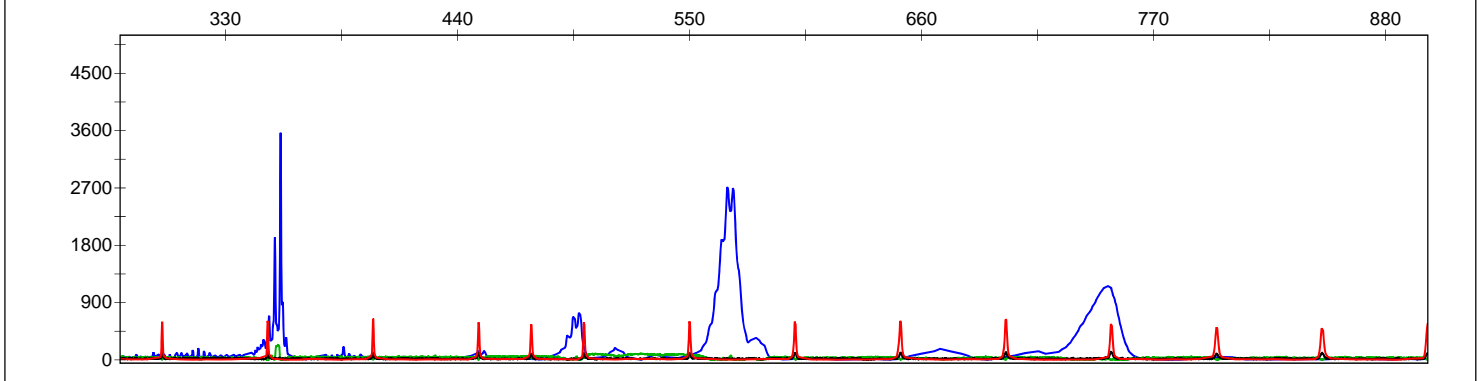

| Sample File       | Sample Name | Panel        | OS                                   | SQ                                   |
|-------------------|-------------|--------------|--------------------------------------|--------------------------------------|
| 7-04-PM12 D01.fsa | 7-04-PM12   | R62 150-1500 | <span style="color: green;">■</span> | <span style="color: green;">■</span> |

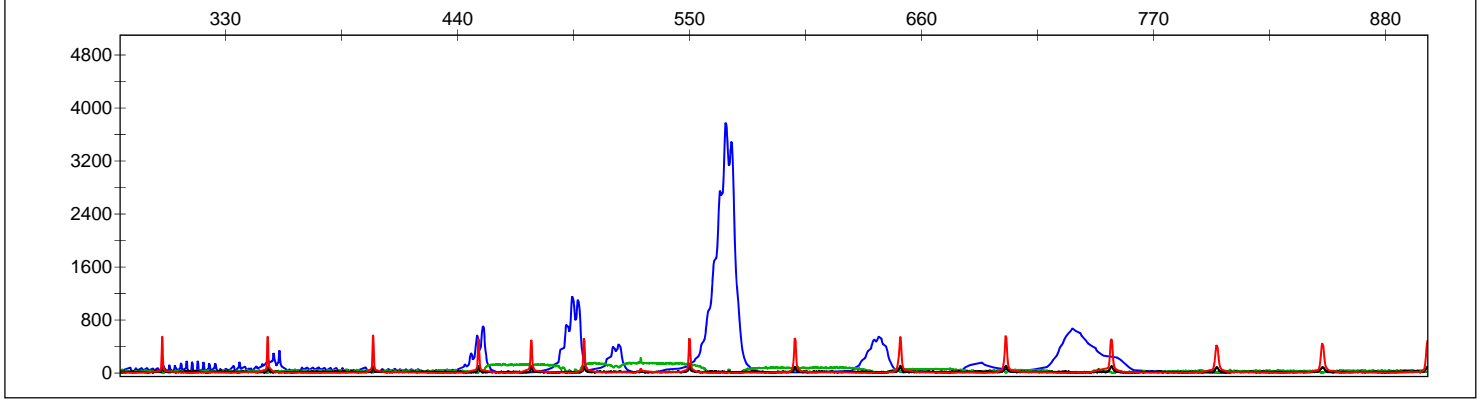



| Sample File       | Sample Name | Panel        | OS | SQ |
|-------------------|-------------|--------------|----|----|
| 7-05-PM13 E01.fsa | 7-05-PM13   | R62 150-1500 | ■  | ■  |

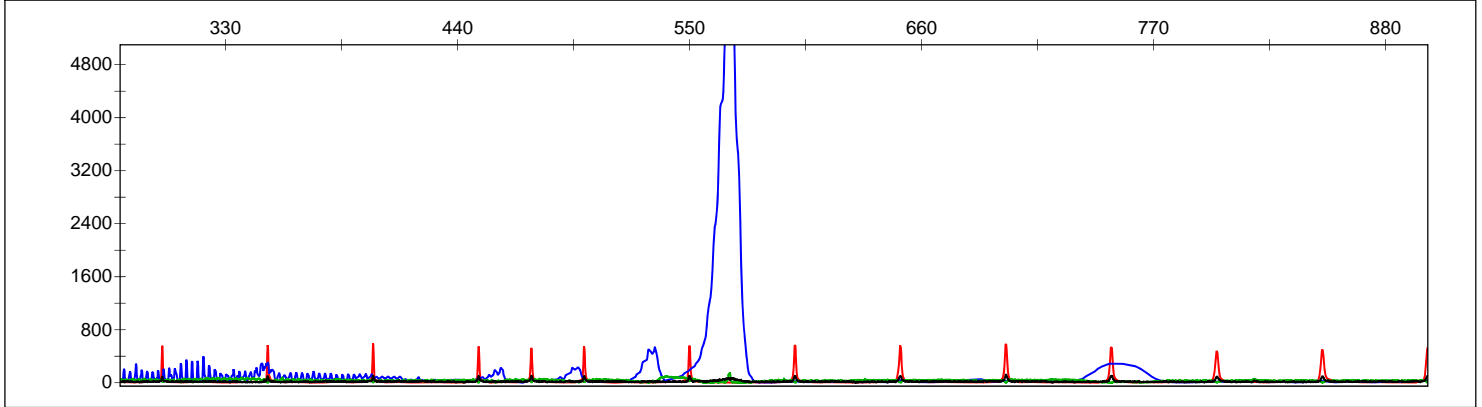

| Sample File       | Sample Name | Panel        | OS | SQ |
|-------------------|-------------|--------------|----|----|
| 7-06-PM14 F01.fsa | 7-06-PM14   | R62 150-1500 | ■  | ■  |

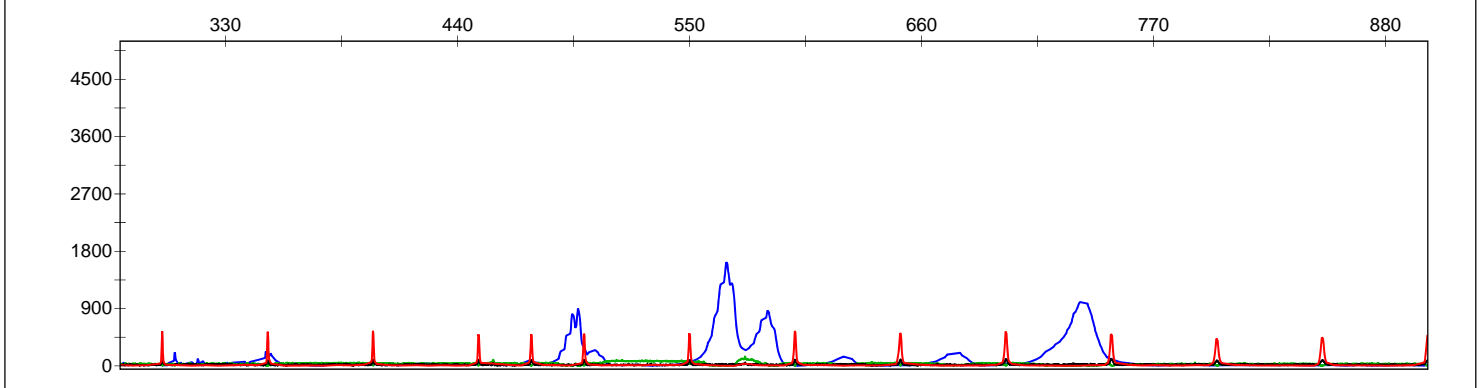

| Sample File       | Sample Name | Panel        | OS | SQ |
|-------------------|-------------|--------------|----|----|
| 7-07-PM15 G01.fsa | 7-07-PM15   | R62 150-1500 | ■  | ■  |

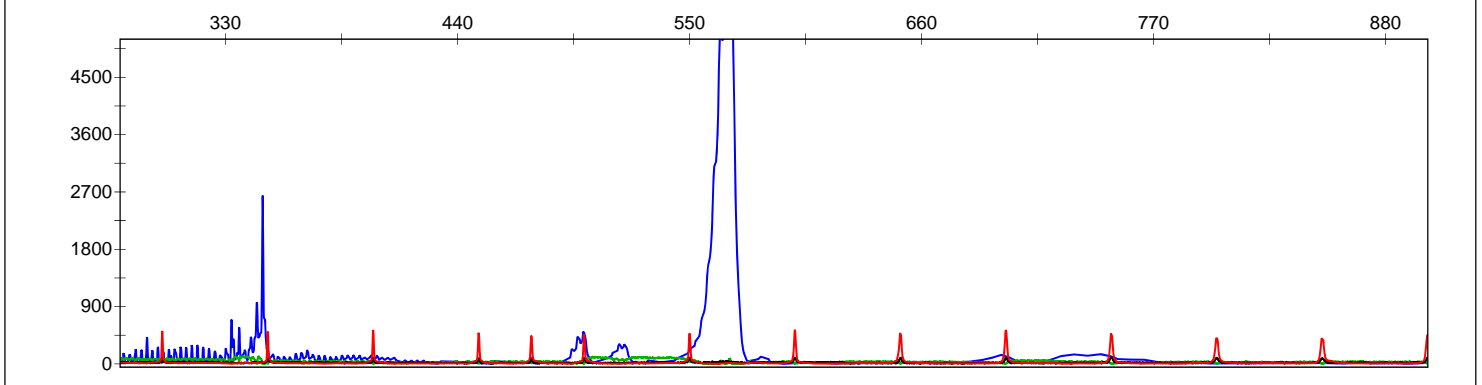

| Sample File       | Sample Name | Panel        | OS | SQ |
|-------------------|-------------|--------------|----|----|
| 7-08-PM16 H01.fsa | 7-08-PM16   | R62 150-1500 | ▲  | ■  |

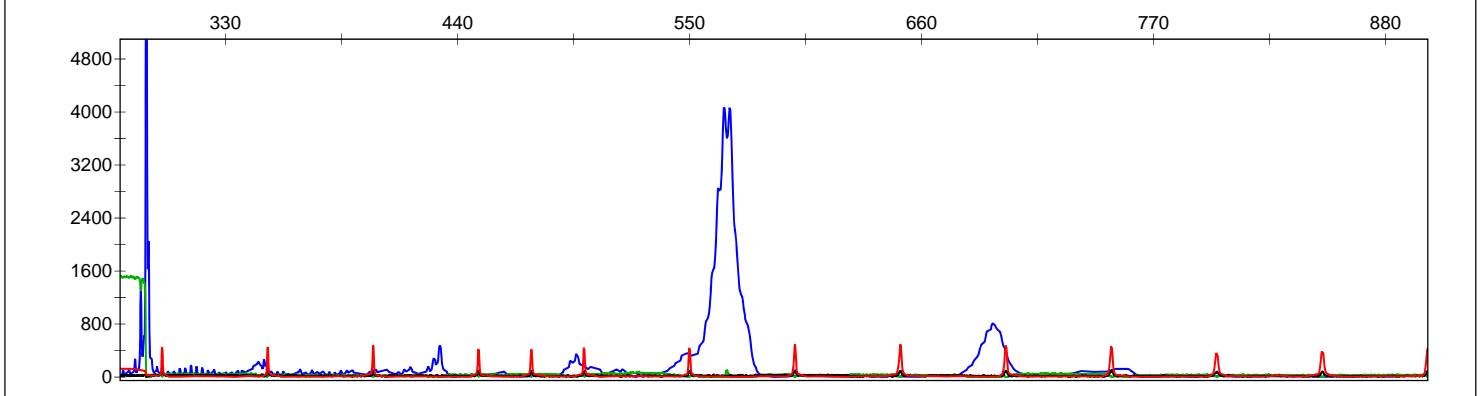

| Sample File       | Sample Name | Panel        | OS                                   | SQ                                   |
|-------------------|-------------|--------------|--------------------------------------|--------------------------------------|
| 7-09-PM17 A02.fsa | 7-09-PM17   | R62 150-1500 | <span style="color: green;">■</span> | <span style="color: green;">■</span> |

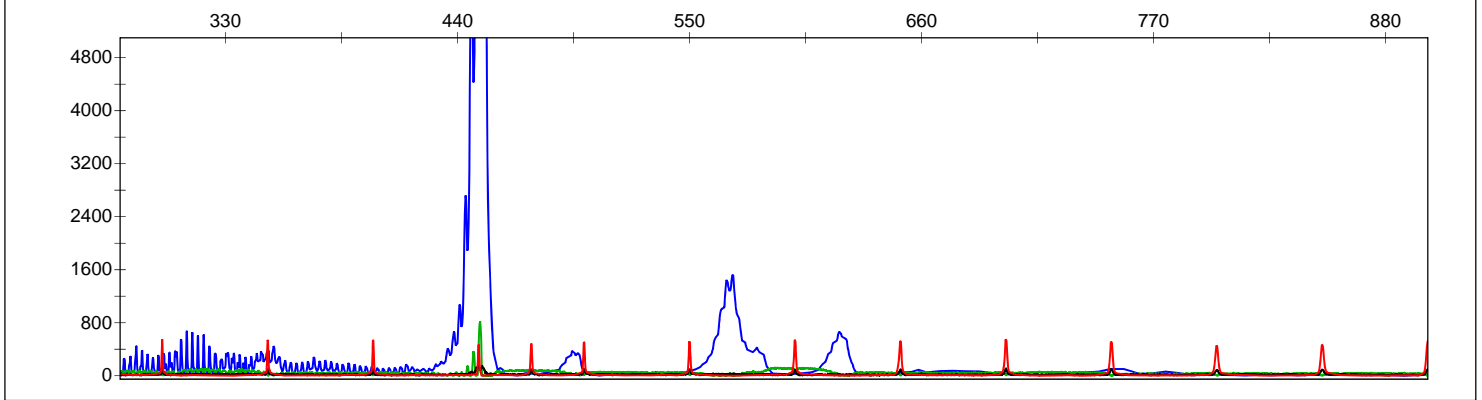

| Sample File       | Sample Name | Panel        | OS                                   | SQ                                   |
|-------------------|-------------|--------------|--------------------------------------|--------------------------------------|
| 7-10-PM18 B02.fsa | 7-10-PM18   | R62 150-1500 | <span style="color: green;">■</span> | <span style="color: green;">■</span> |

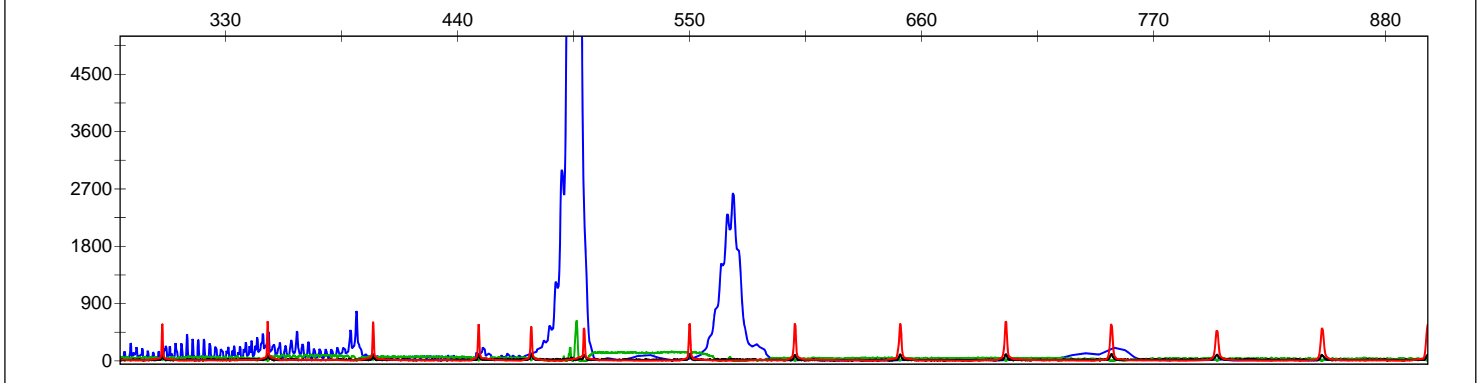

| Sample File       | Sample Name | Panel        | OS                                   | SQ                                   |
|-------------------|-------------|--------------|--------------------------------------|--------------------------------------|
| 7-11-PM19 C02.fsa | 7-11-PM19   | R62 150-1500 | <span style="color: green;">■</span> | <span style="color: green;">■</span> |

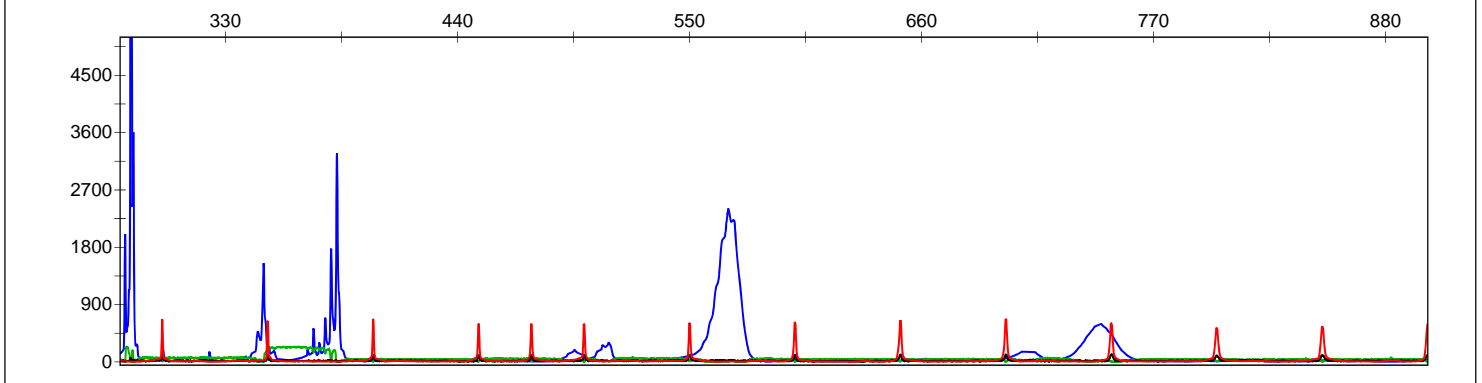

| Sample File       | Sample Name | Panel        | OS                                   | SQ                                   |
|-------------------|-------------|--------------|--------------------------------------|--------------------------------------|
| 7-12-PM20 D02.fsa | 7-12-PM20   | R62 150-1500 | <span style="color: green;">■</span> | <span style="color: green;">■</span> |

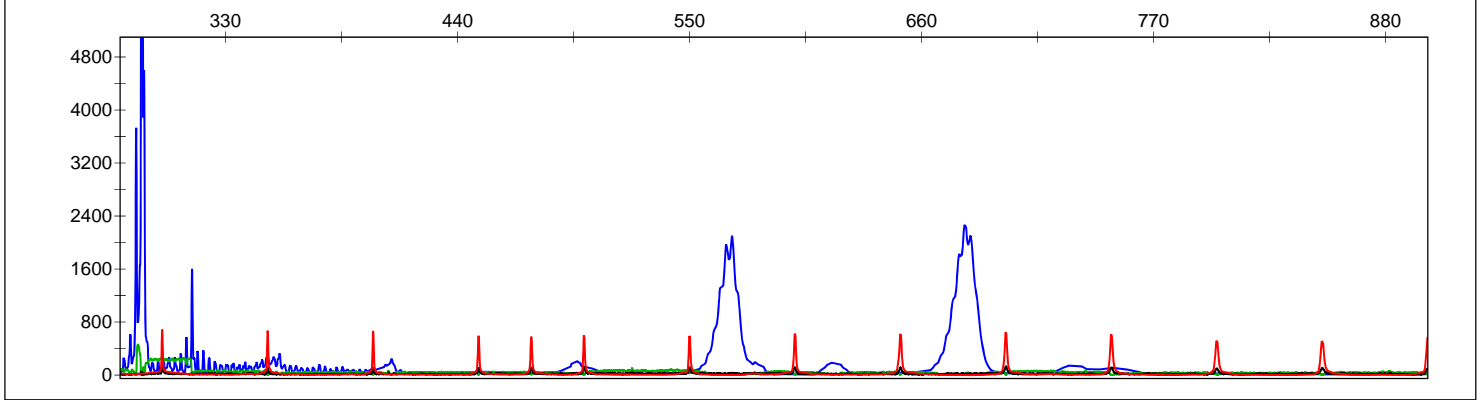

| Sample File       | Sample Name | Panel        | OS                                   | SQ                                   |
|-------------------|-------------|--------------|--------------------------------------|--------------------------------------|
| 7-13-PM21 E02.fsa | 7-13-PM21   | R62 150-1500 | <span style="color: green;">■</span> | <span style="color: green;">■</span> |

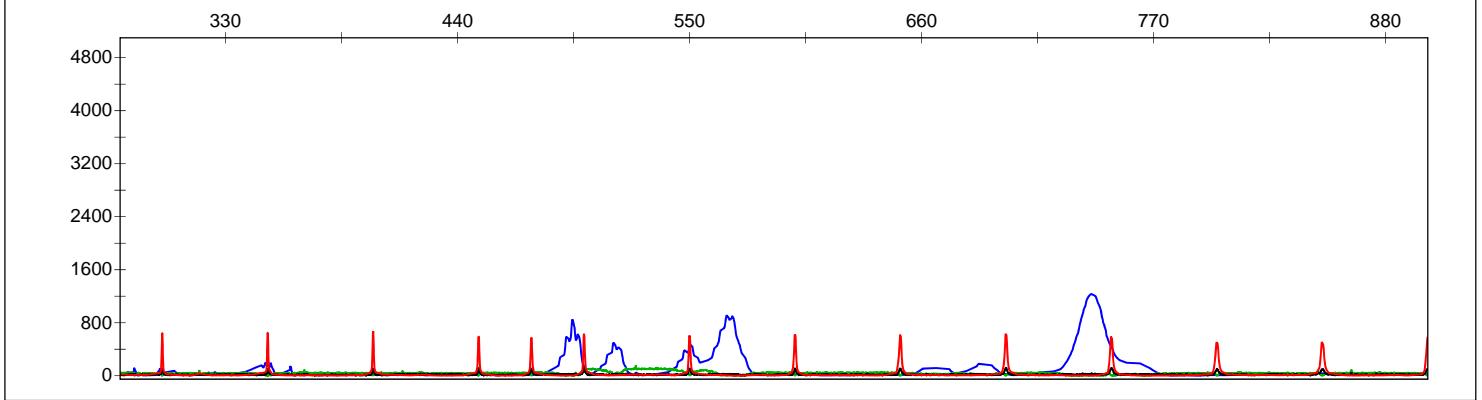

| Sample File       | Sample Name | Panel        | OS                                   | SQ                                   |
|-------------------|-------------|--------------|--------------------------------------|--------------------------------------|
| 7-14-PM22 F02.fsa | 7-14-PM22   | R62 150-1500 | <span style="color: green;">■</span> | <span style="color: green;">■</span> |

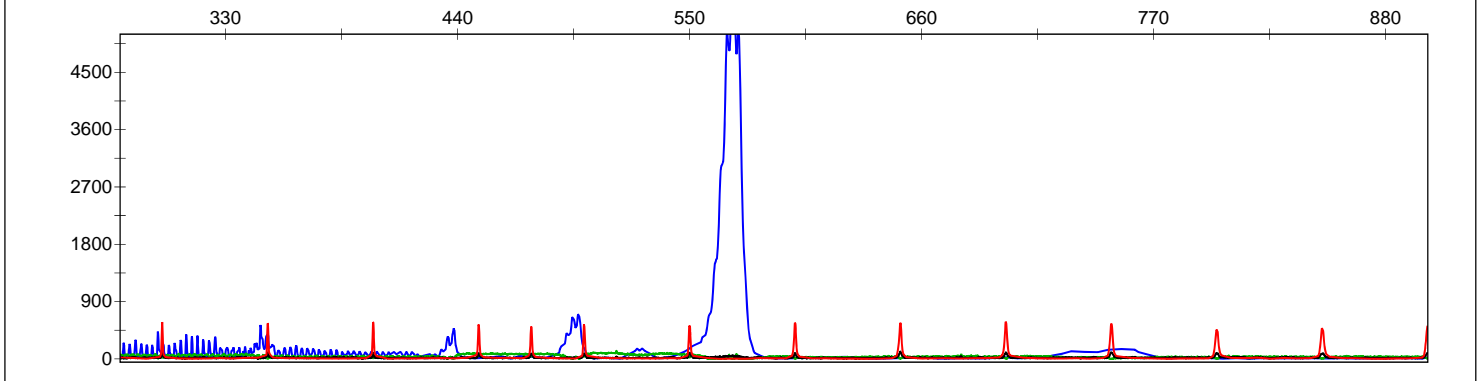

| Sample File       | Sample Name | Panel        | OS                                   | SQ                                   |
|-------------------|-------------|--------------|--------------------------------------|--------------------------------------|
| 7-15-PM23 G02.fsa | 7-15-PM23   | R62 150-1500 | <span style="color: green;">■</span> | <span style="color: green;">■</span> |

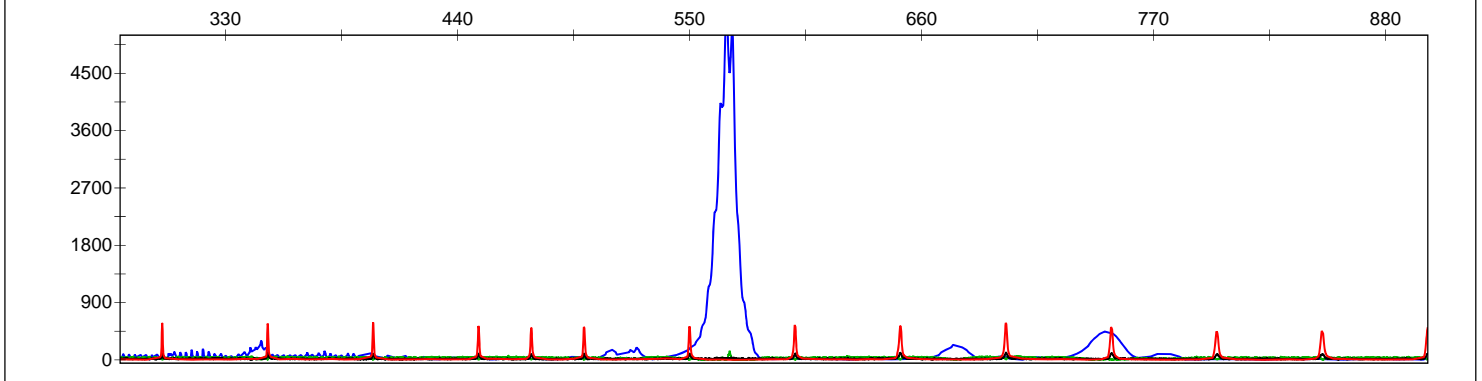

| Sample File       | Sample Name | Panel        | OS                                   | SQ                                   |
|-------------------|-------------|--------------|--------------------------------------|--------------------------------------|
| 7-16-PM24 H02.fsa | 7-16-PM24   | R62 150-1500 | <span style="color: green;">■</span> | <span style="color: green;">■</span> |

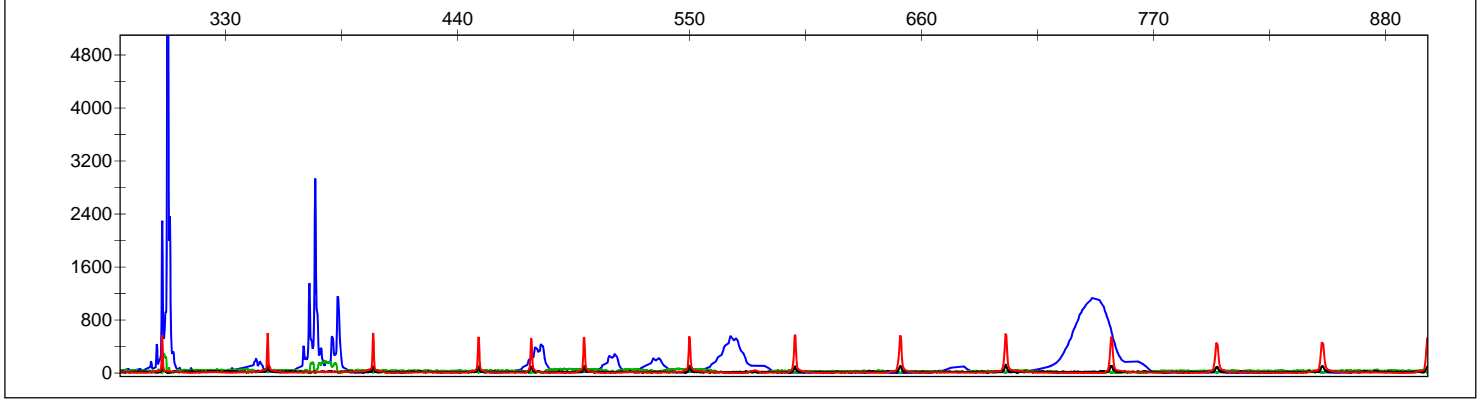

| Sample File       | Sample Name | Panel        | OS | SQ |
|-------------------|-------------|--------------|----|----|
| 7-17-PM25 A03.fsa | 7-17-PM25   | R62 150-1500 | ■  | ■  |

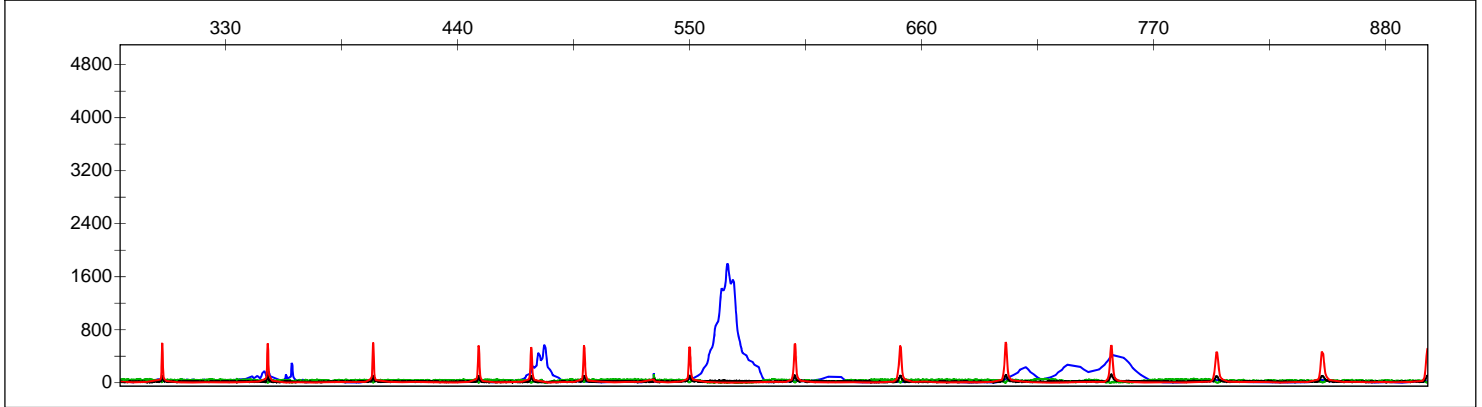

|                   |           |              |   |   |
|-------------------|-----------|--------------|---|---|
| 7-18-PM26 B03.fsa | 7-18-PM26 | R62 150-1500 | ▲ | ■ |
|-------------------|-----------|--------------|---|---|

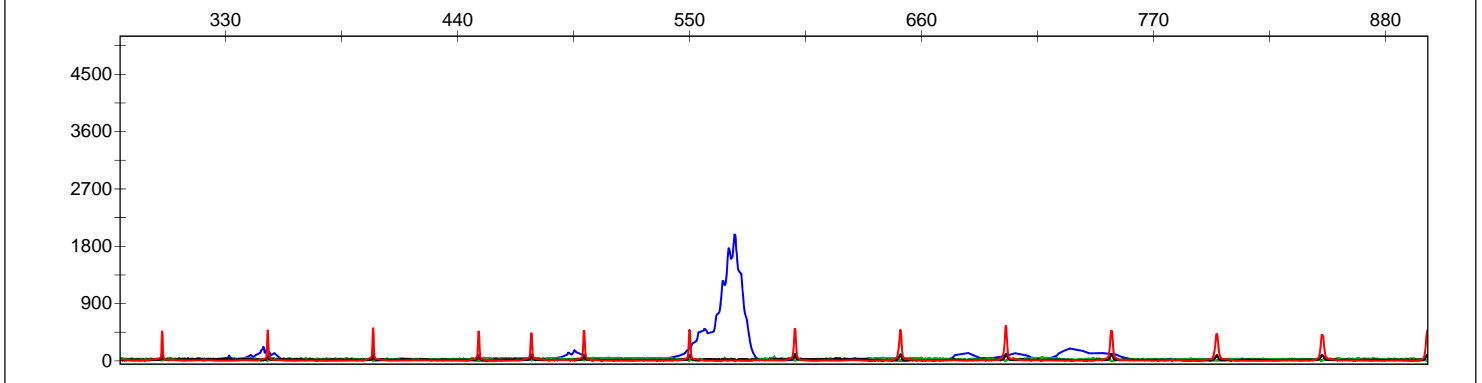

|                   |           |              |   |   |
|-------------------|-----------|--------------|---|---|
| 7-19-PM27 C03.fsa | 7-19-PM27 | R62 150-1500 | ▲ | ■ |
|-------------------|-----------|--------------|---|---|

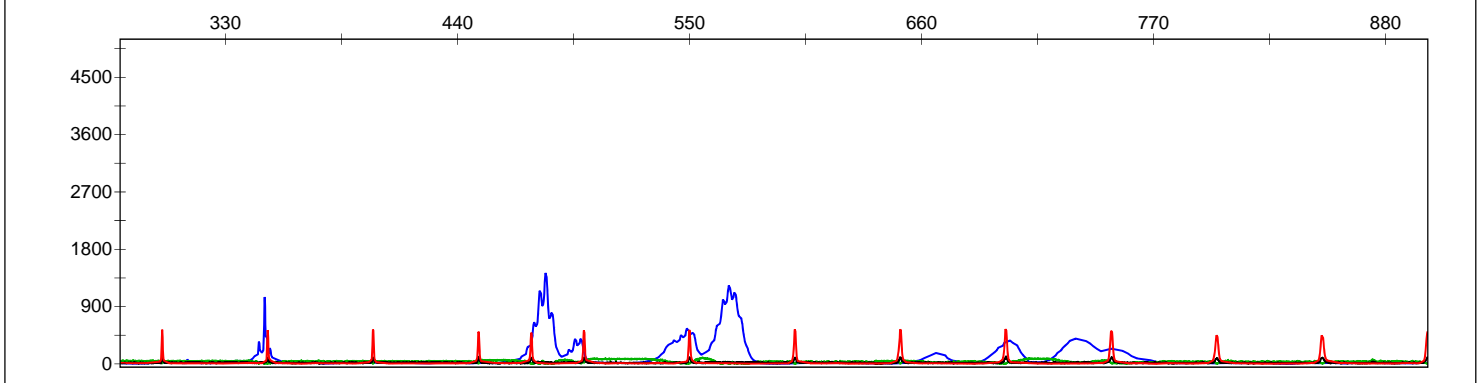

|                   |           |              |   |   |
|-------------------|-----------|--------------|---|---|
| 7-20-PM28 D03.fsa | 7-20-PM28 | R62 150-1500 | ▲ | ■ |
|-------------------|-----------|--------------|---|---|

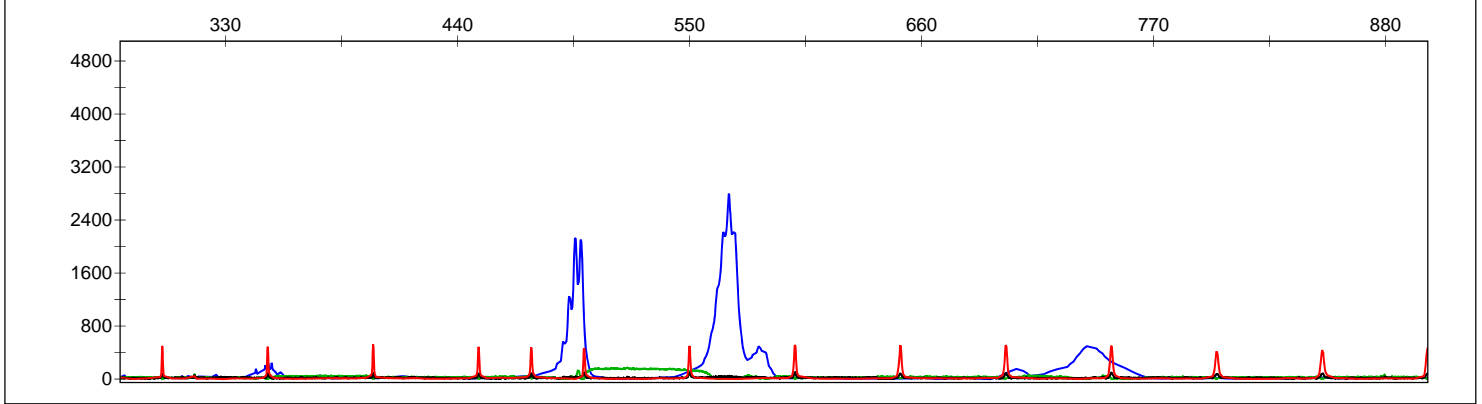

| Sample File       | Sample Name | Panel        | OS                                   | SQ                                   |
|-------------------|-------------|--------------|--------------------------------------|--------------------------------------|
| 7-21-PM29 E03.fsa | 7-21-PM29   | R62 150-1500 | <span style="color: green;">■</span> | <span style="color: green;">■</span> |

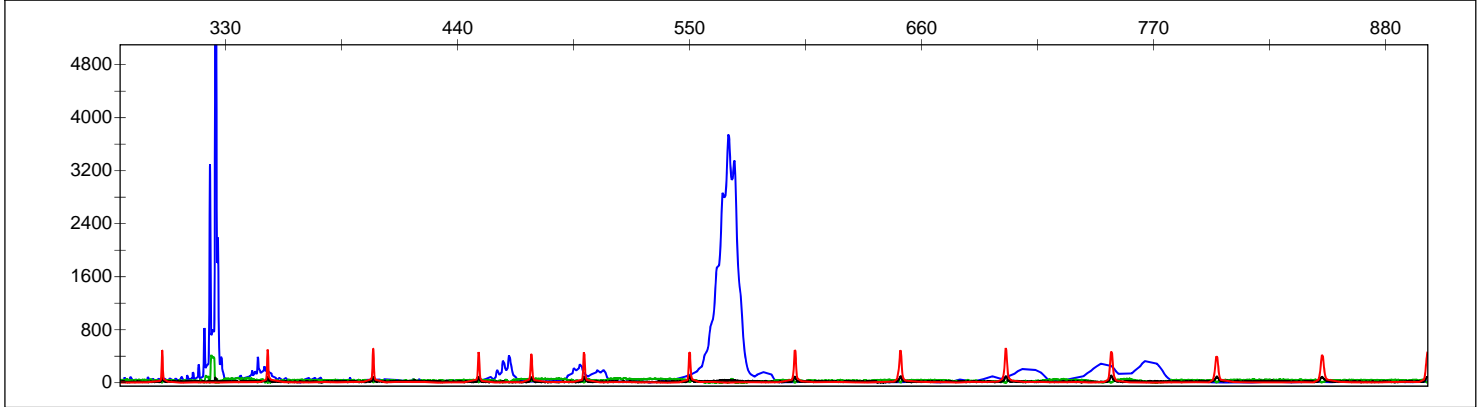

| Sample File       | Sample Name | Panel        | OS                                   | SQ                                   |
|-------------------|-------------|--------------|--------------------------------------|--------------------------------------|
| 7-22-PM30 F03.fsa | 7-22-PM30   | R62 150-1500 | <span style="color: green;">■</span> | <span style="color: green;">■</span> |

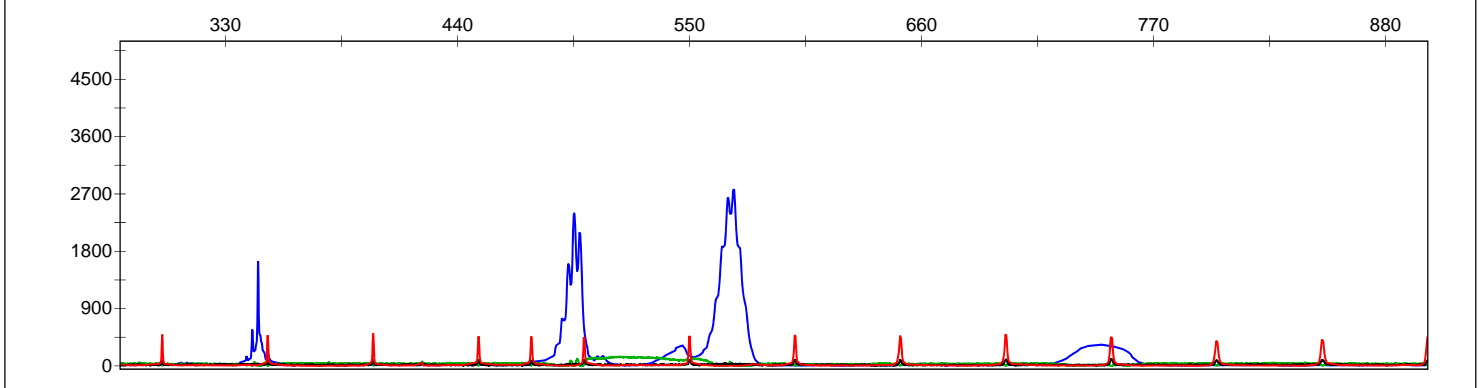

| Sample File       | Sample Name | Panel        | OS                                   | SQ                                   |
|-------------------|-------------|--------------|--------------------------------------|--------------------------------------|
| 7-23-PM31 G03.fsa | 7-23-PM31   | R62 150-1500 | <span style="color: green;">■</span> | <span style="color: green;">■</span> |

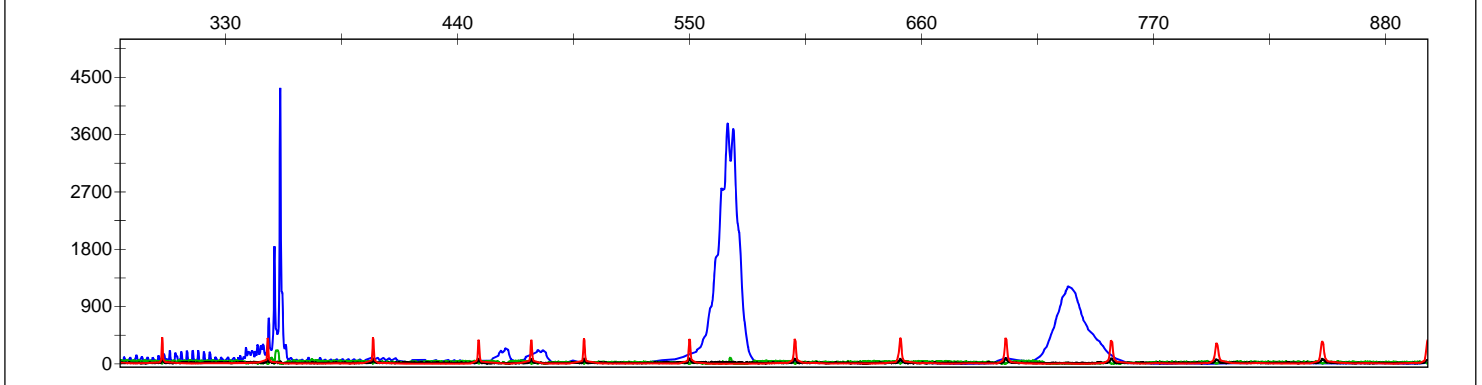

| Sample File       | Sample Name | Panel        | OS                                   | SQ                                   |
|-------------------|-------------|--------------|--------------------------------------|--------------------------------------|
| 7-24-PM32 H03.fsa | 7-24-PM32   | R62 150-1500 | <span style="color: green;">■</span> | <span style="color: green;">■</span> |

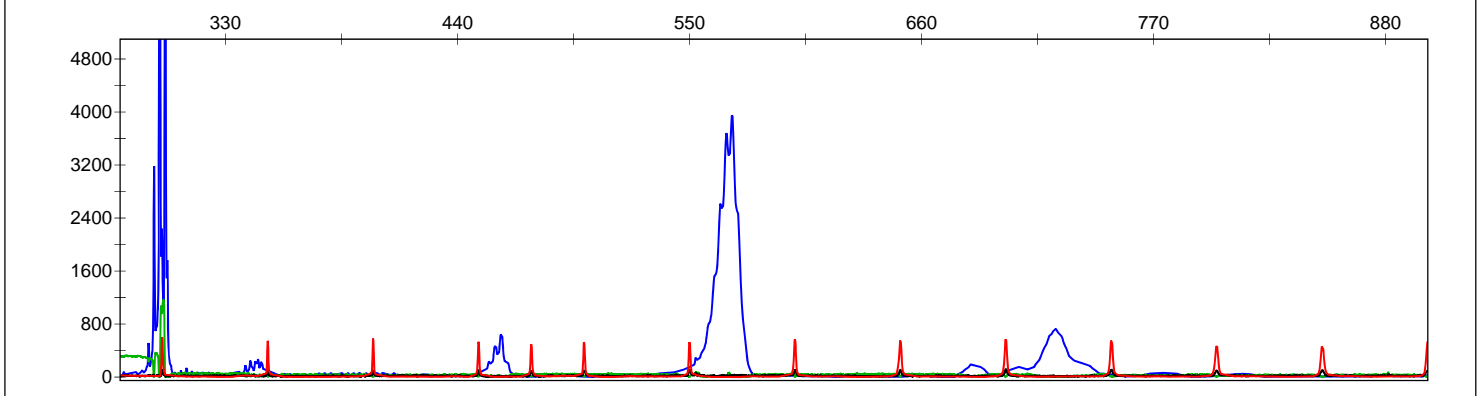

| Sample File       | Sample Name | Panel        | OS                                   | SQ                                   |
|-------------------|-------------|--------------|--------------------------------------|--------------------------------------|
| 7-25-PM33 A04.fsa | 7-25-PM33   | R62 150-1500 | <span style="color: green;">■</span> | <span style="color: green;">■</span> |

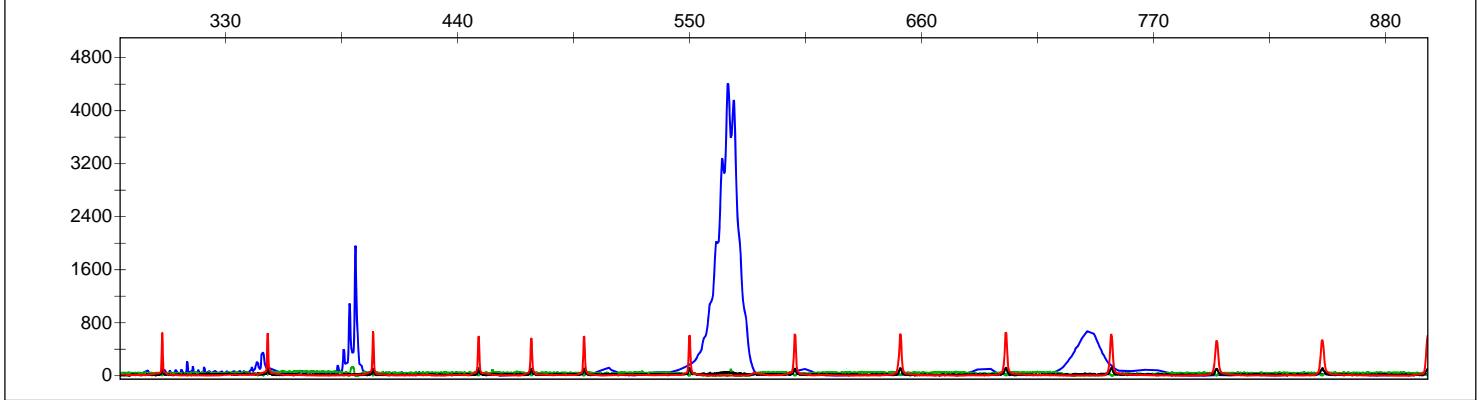

| Sample File       | Sample Name | Panel        | OS                                   | SQ                                   |
|-------------------|-------------|--------------|--------------------------------------|--------------------------------------|
| 7-26-PM34 B04.fsa | 7-26-PM34   | R62 150-1500 | <span style="color: green;">■</span> | <span style="color: green;">■</span> |

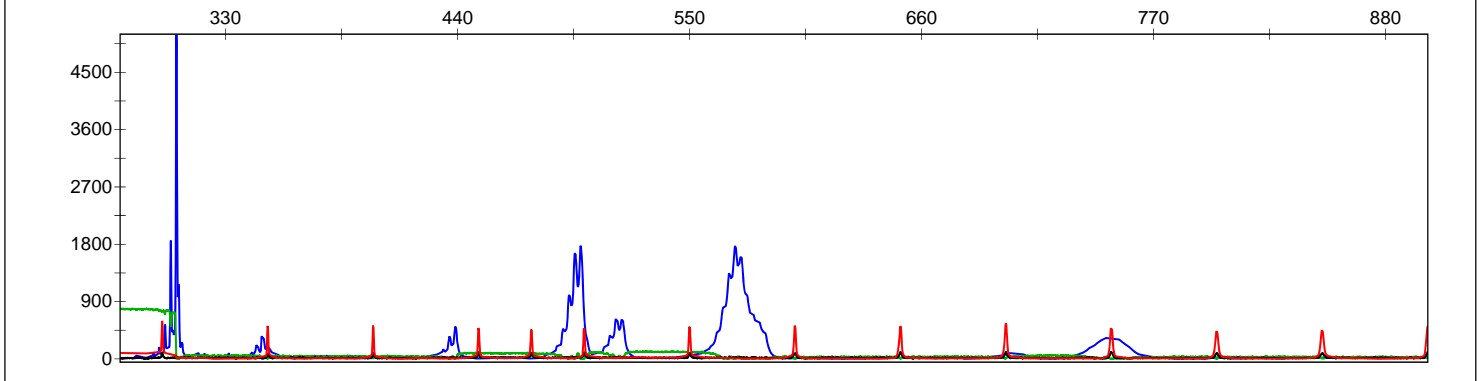

| Sample File       | Sample Name | Panel        | OS                                   | SQ                                   |
|-------------------|-------------|--------------|--------------------------------------|--------------------------------------|
| 7-27-PM35 C04.fsa | 7-27-PM35   | R62 150-1500 | <span style="color: green;">■</span> | <span style="color: green;">■</span> |

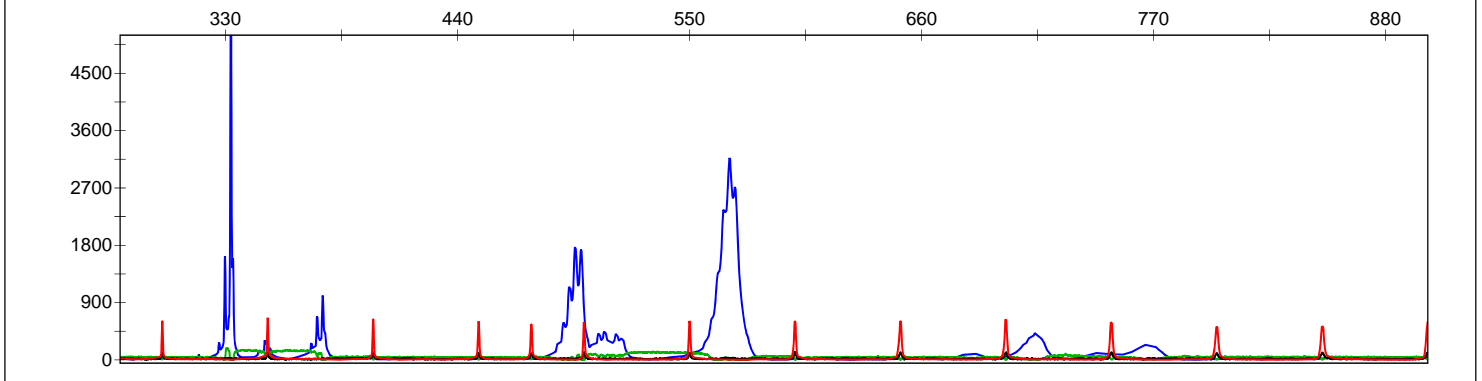

| Sample File       | Sample Name | Panel        | OS                                   | SQ                                   |
|-------------------|-------------|--------------|--------------------------------------|--------------------------------------|
| 7-28-PM36 D04.fsa | 7-28-PM36   | R62 150-1500 | <span style="color: green;">■</span> | <span style="color: green;">■</span> |

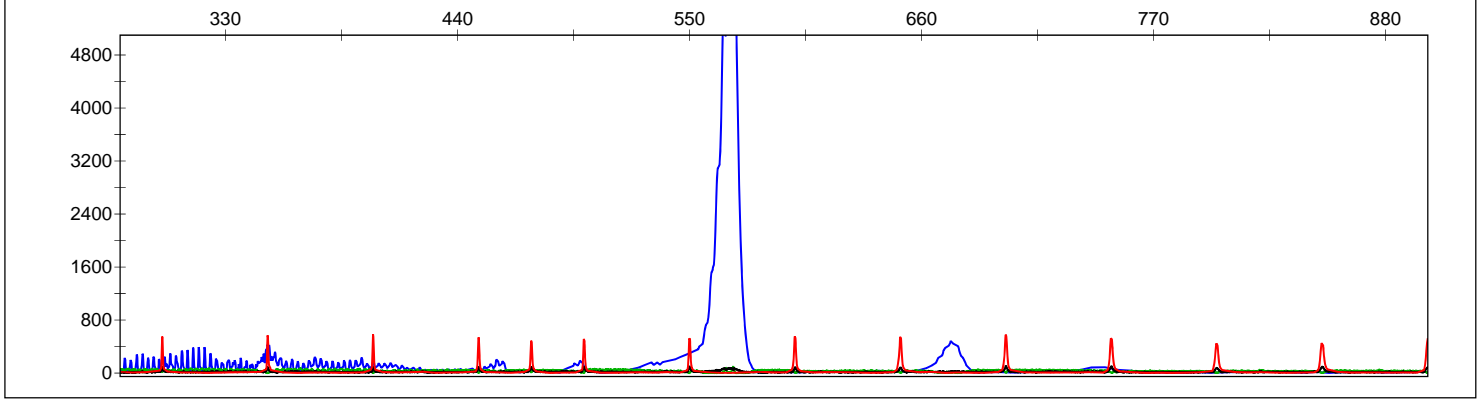

| Sample File       | Sample Name | Panel        | OS | SQ |
|-------------------|-------------|--------------|----|----|
| 7-29-PM37 E04.fsa | 7-29-PM37   | R62 150-1500 | ■  | ■  |

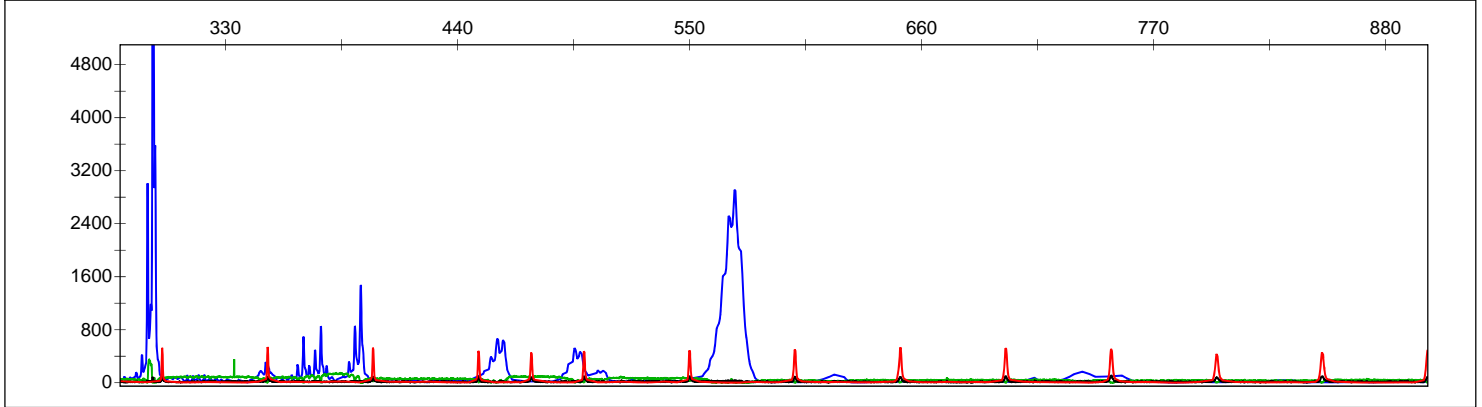

| Sample File       | Sample Name | Panel        | OS | SQ |
|-------------------|-------------|--------------|----|----|
| 7-30-PM38 F04.fsa | 7-30-PM38   | R62 150-1500 | ■  | ■  |

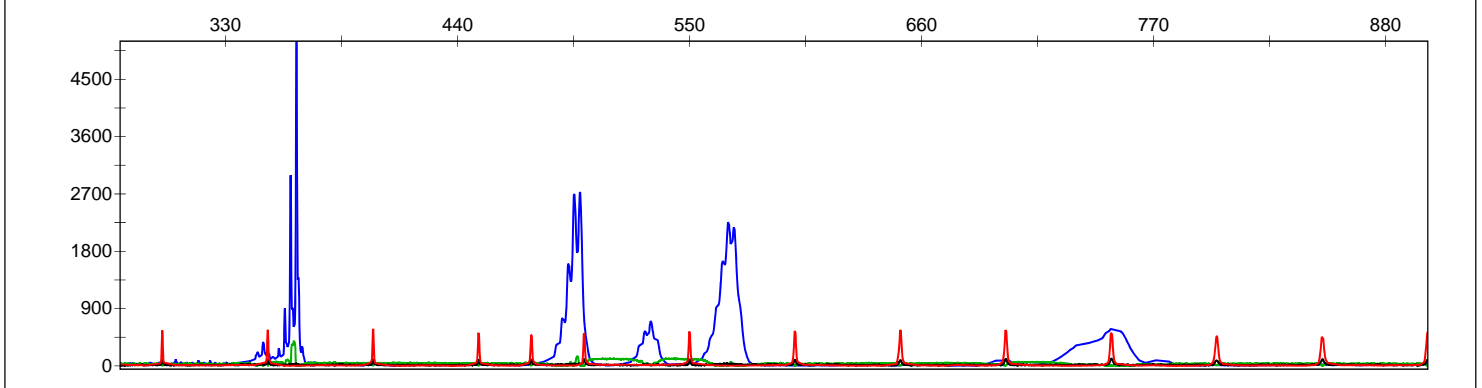

| Sample File       | Sample Name | Panel        | OS | SQ |
|-------------------|-------------|--------------|----|----|
| 7-31-PM39 G04.fsa | 7-31-PM39   | R62 150-1500 | ▲  | ■  |

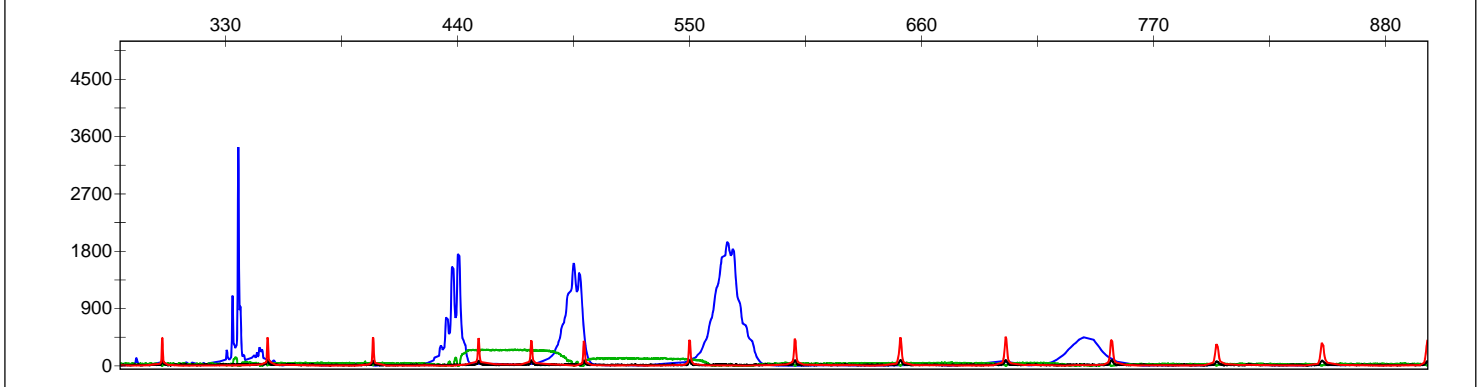

| Sample File       | Sample Name | Panel        | OS | SQ |
|-------------------|-------------|--------------|----|----|
| 7-32-PM40 H04.fsa | 7-32-PM40   | R62 150-1500 | ■  | ■  |

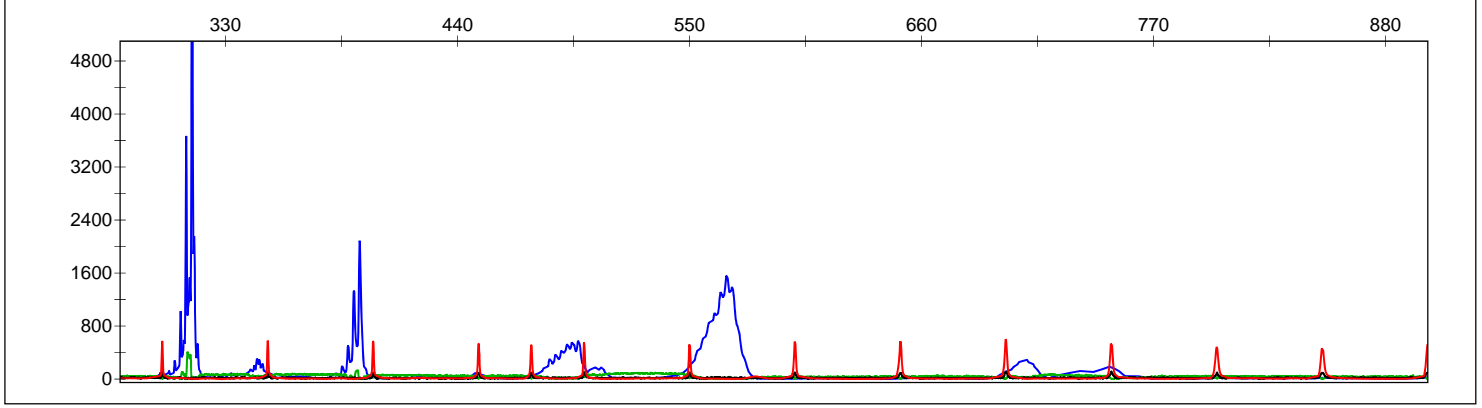

| Sample File       | Sample Name | Panel        | OS                                   | SQ                                   |
|-------------------|-------------|--------------|--------------------------------------|--------------------------------------|
| 7-33-PM41 A05.fsa | 7-33-PM41   | R62 150-1500 | <span style="color: green;">■</span> | <span style="color: green;">■</span> |

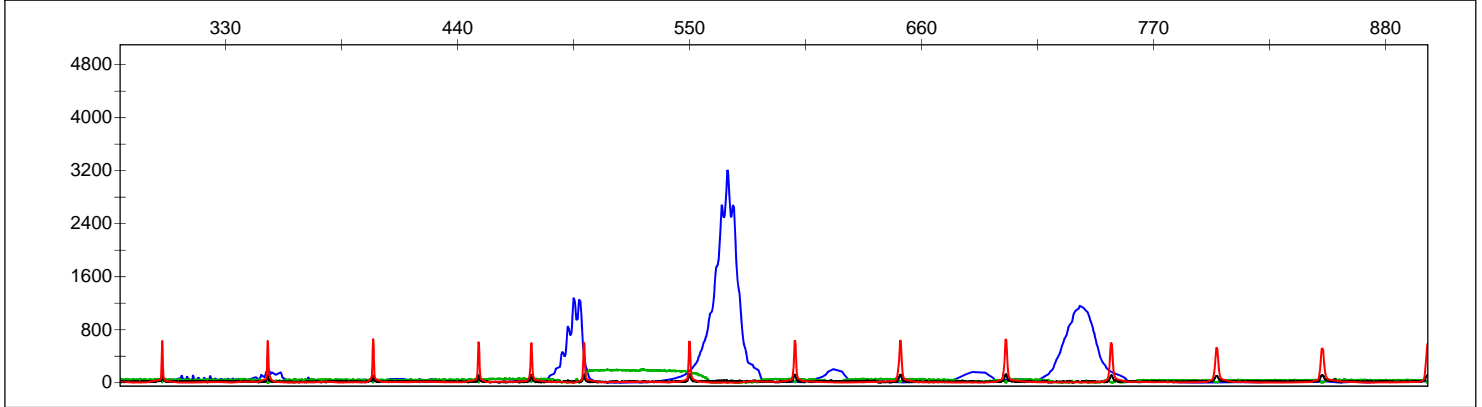

| Sample File       | Sample Name | Panel        | OS                                   | SQ                                   |
|-------------------|-------------|--------------|--------------------------------------|--------------------------------------|
| 7-34-PM42 B05.fsa | 7-34-PM42   | R62 150-1500 | <span style="color: green;">■</span> | <span style="color: green;">■</span> |

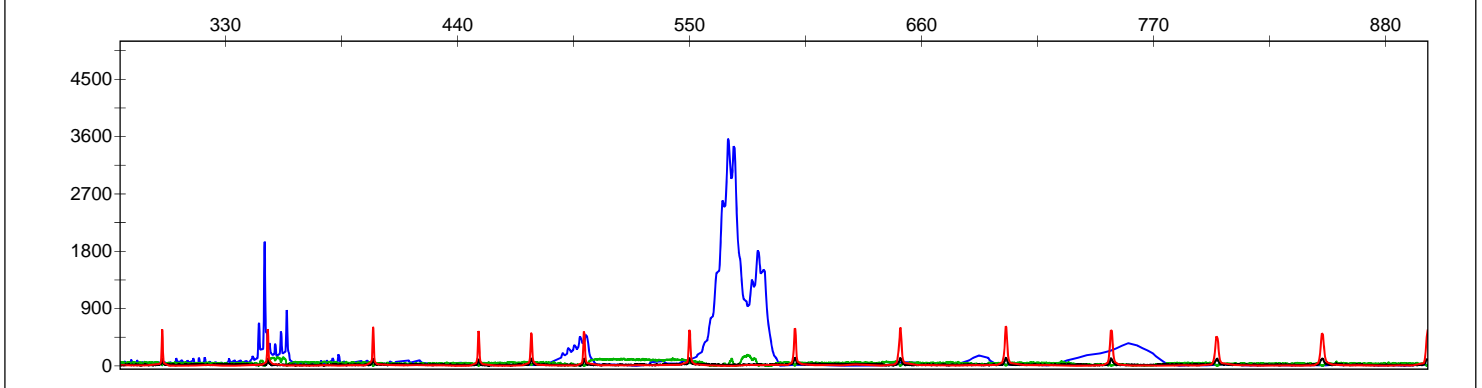

| Sample File       | Sample Name | Panel        | OS                                   | SQ                                   |
|-------------------|-------------|--------------|--------------------------------------|--------------------------------------|
| 7-35-PM43 C05.fsa | 7-35-PM43   | R62 150-1500 | <span style="color: green;">■</span> | <span style="color: green;">■</span> |

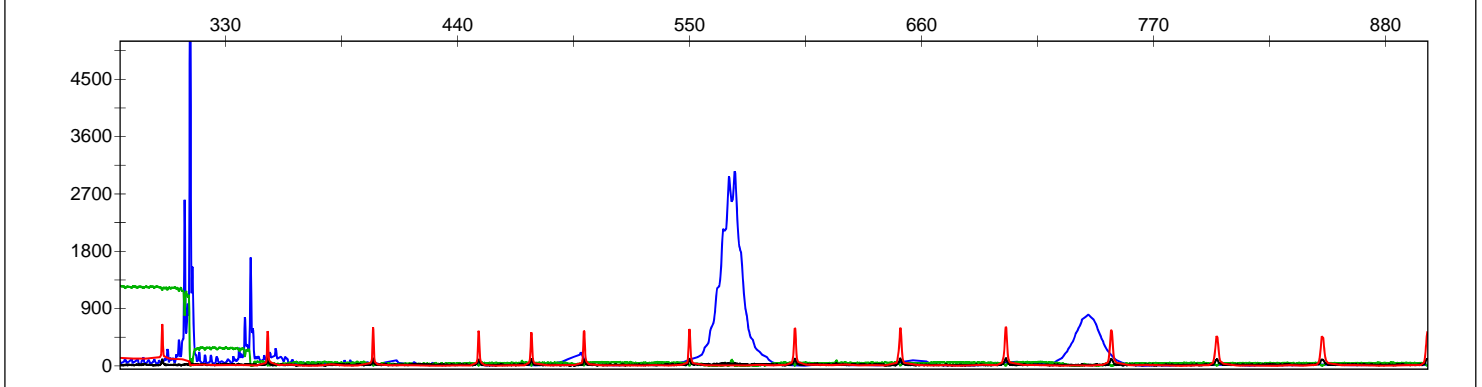

| Sample File       | Sample Name | Panel        | OS                                   | SQ                                   |
|-------------------|-------------|--------------|--------------------------------------|--------------------------------------|
| 7-36-PM44 D05.fsa | 7-36-PM44   | R62 150-1500 | <span style="color: green;">■</span> | <span style="color: green;">■</span> |

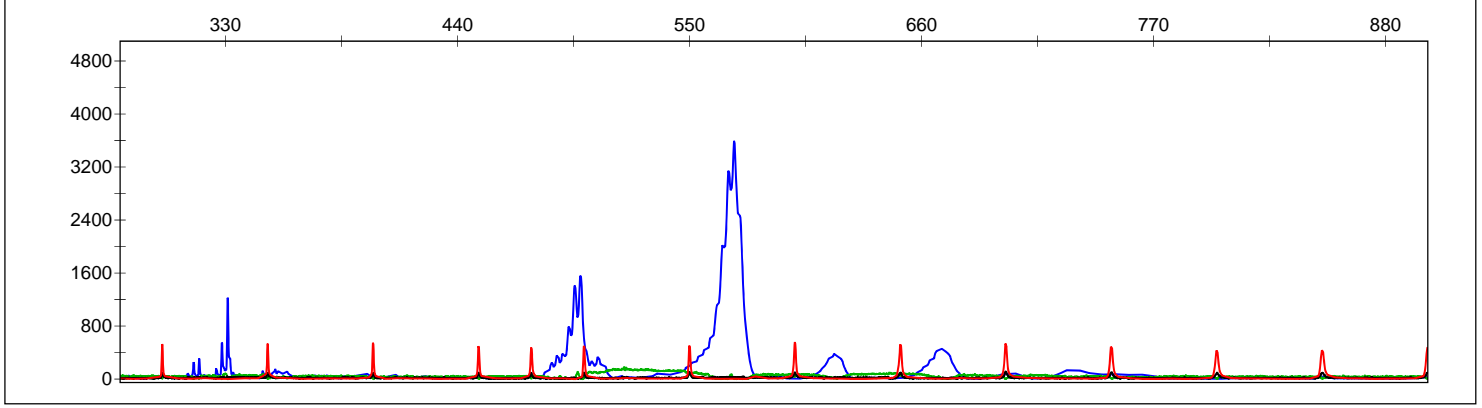



| Sample File       | Sample Name | Panel        | OS                                   | SQ                                   |
|-------------------|-------------|--------------|--------------------------------------|--------------------------------------|
| 7-37-PM45 E05.fsa | 7-37-PM45   | R62 150-1500 | <span style="color: green;">■</span> | <span style="color: green;">■</span> |

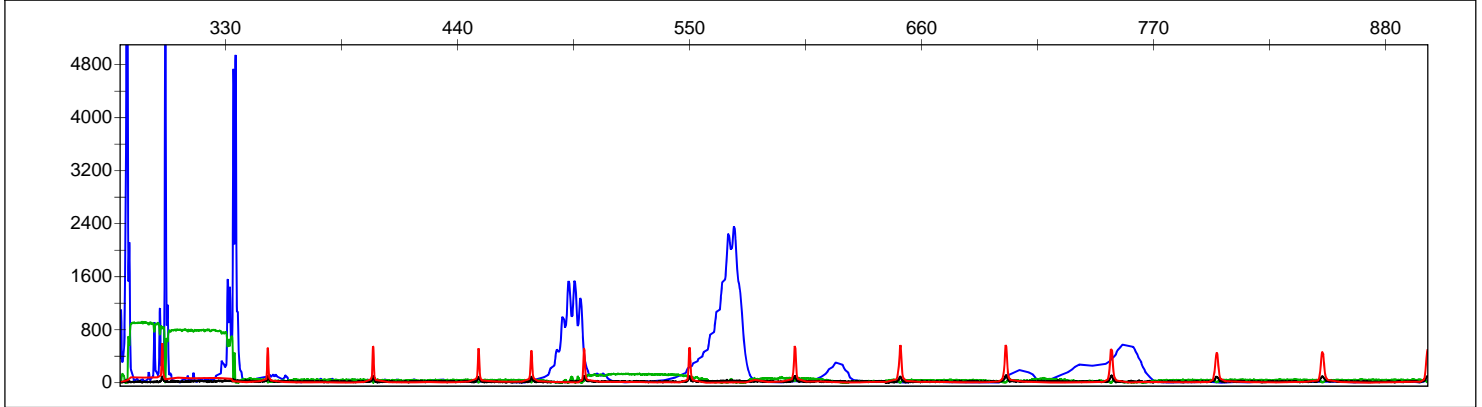

| Sample File       | Sample Name | Panel        | OS                                   | SQ                                   |
|-------------------|-------------|--------------|--------------------------------------|--------------------------------------|
| 7-38-PM46 F05.fsa | 7-38-PM46   | R62 150-1500 | <span style="color: green;">■</span> | <span style="color: green;">■</span> |

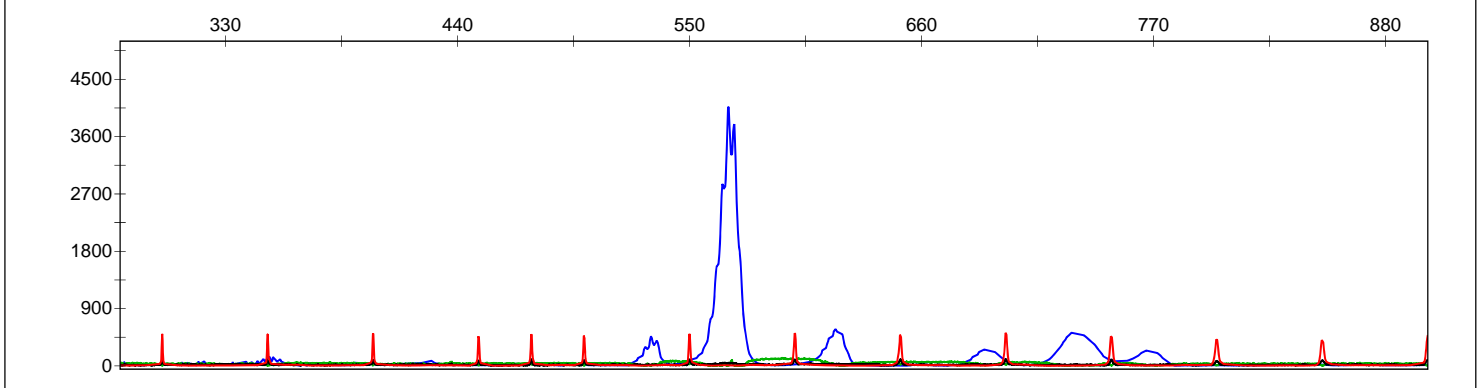

| Sample File       | Sample Name | Panel        | OS                                   | SQ                                   |
|-------------------|-------------|--------------|--------------------------------------|--------------------------------------|
| 7-39-PM47 G05.fsa | 7-39-PM47   | R62 150-1500 | <span style="color: green;">■</span> | <span style="color: green;">■</span> |

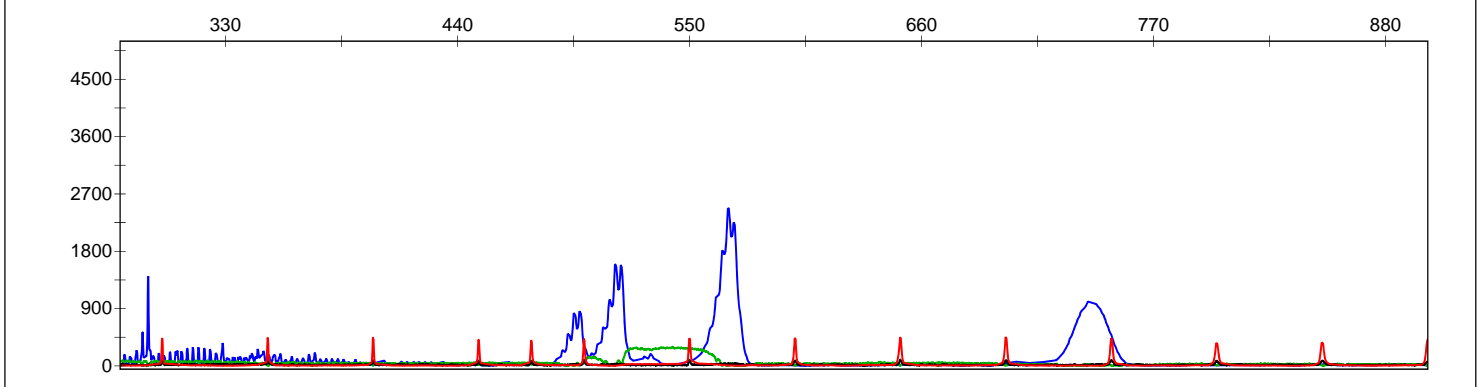

| Sample File       | Sample Name | Panel        | OS                                   | SQ                                   |
|-------------------|-------------|--------------|--------------------------------------|--------------------------------------|
| 7-40-PM48 H05.fsa | 7-40-PM48   | R62 150-1500 | <span style="color: green;">■</span> | <span style="color: green;">■</span> |

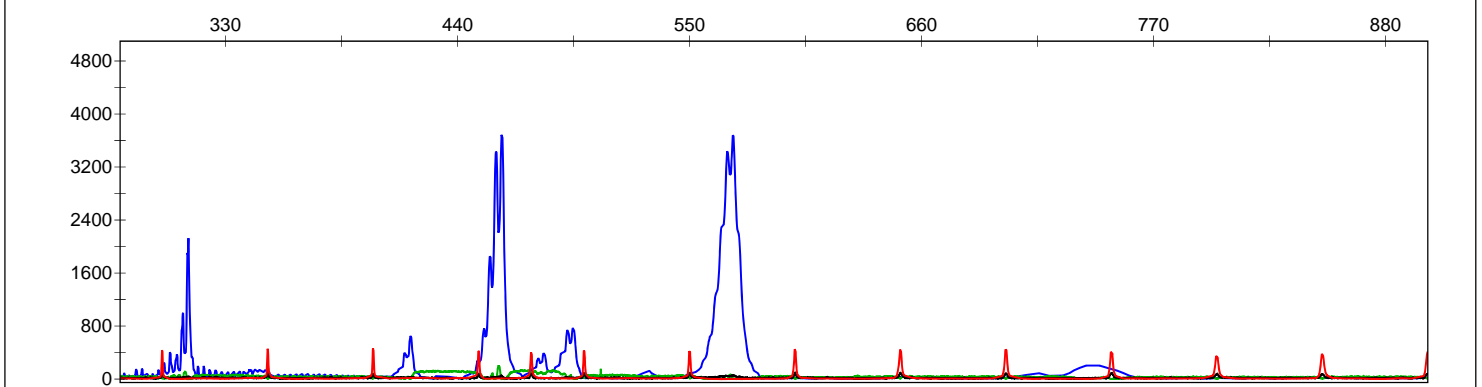

| Sample File       | Sample Name | Panel        | OS                                   | SQ                                   |
|-------------------|-------------|--------------|--------------------------------------|--------------------------------------|
| 7-41-PM49 A06.fsa | 7-41-PM49   | R62 150-1500 | <span style="color: green;">■</span> | <span style="color: green;">■</span> |

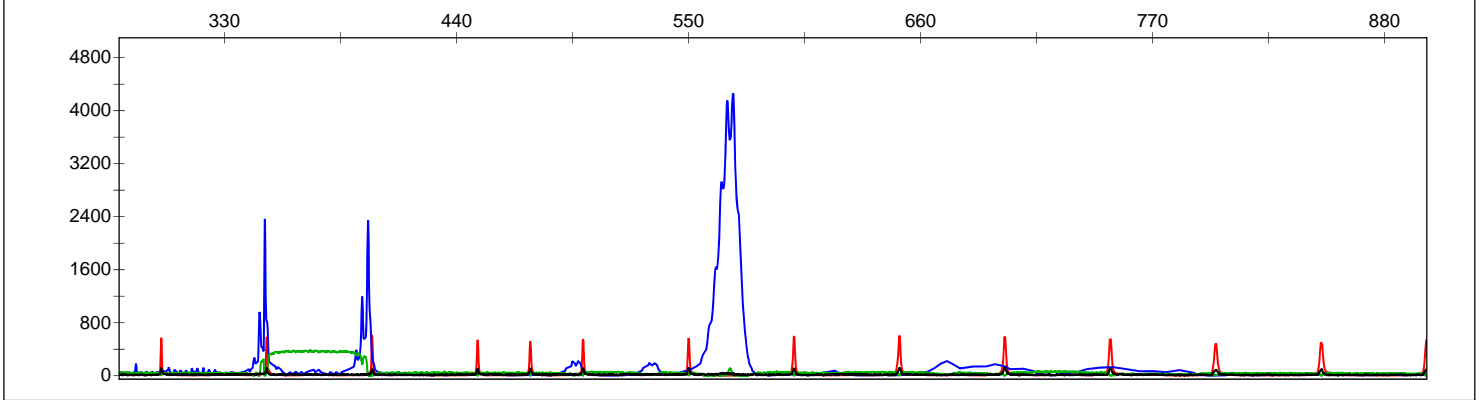

|                   |           |              |                                      |                                      |
|-------------------|-----------|--------------|--------------------------------------|--------------------------------------|
| 7-42-PM50 B06.fsa | 7-42-PM50 | R62 150-1500 | <span style="color: green;">■</span> | <span style="color: green;">■</span> |
|-------------------|-----------|--------------|--------------------------------------|--------------------------------------|

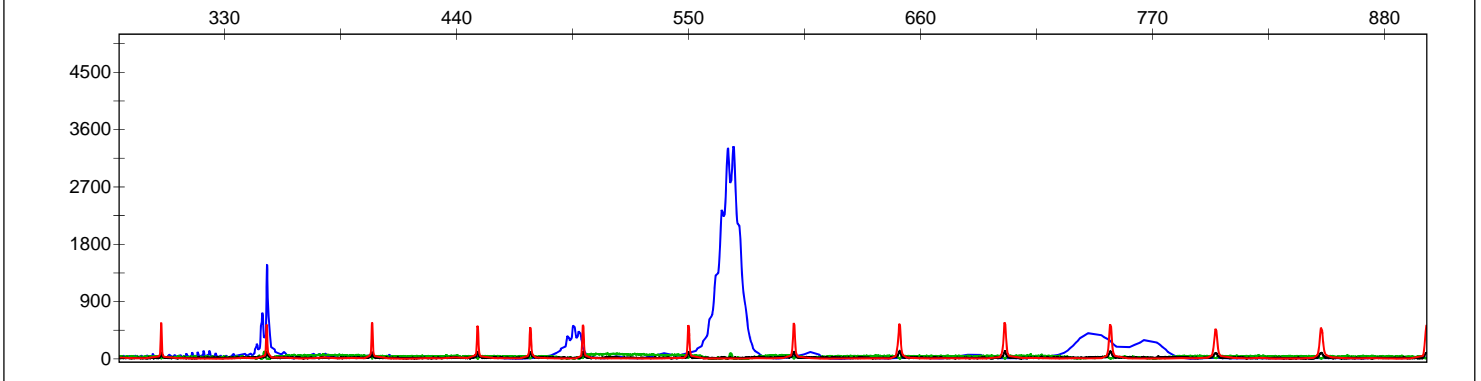

|                   |           |              |                                      |                                      |
|-------------------|-----------|--------------|--------------------------------------|--------------------------------------|
| 7-43-PM51 C06.fsa | 7-43-PM51 | R62 150-1500 | <span style="color: green;">■</span> | <span style="color: green;">■</span> |
|-------------------|-----------|--------------|--------------------------------------|--------------------------------------|

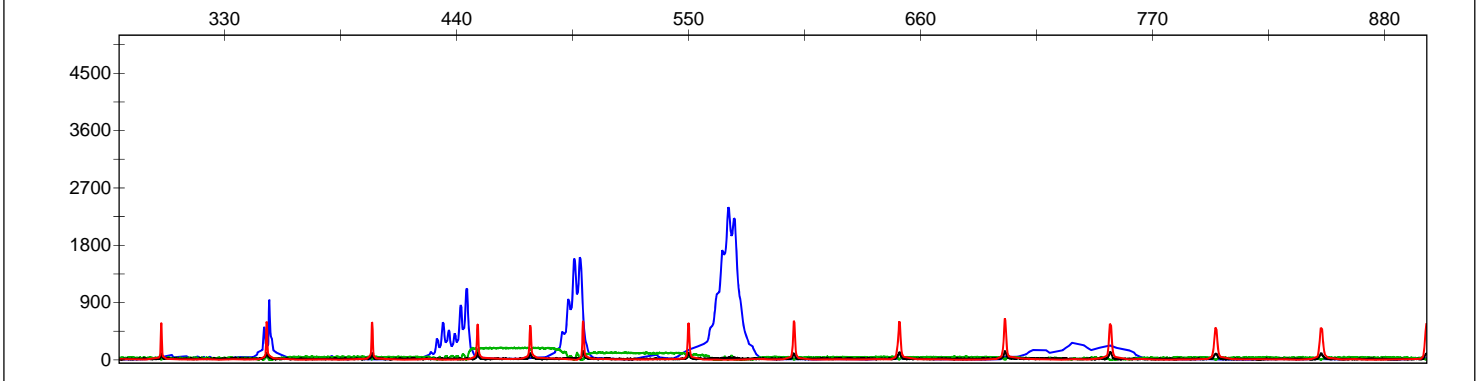

|                   |           |              |                                      |                                      |
|-------------------|-----------|--------------|--------------------------------------|--------------------------------------|
| 7-44-PM52 D06.fsa | 7-44-PM52 | R62 150-1500 | <span style="color: green;">■</span> | <span style="color: green;">■</span> |
|-------------------|-----------|--------------|--------------------------------------|--------------------------------------|

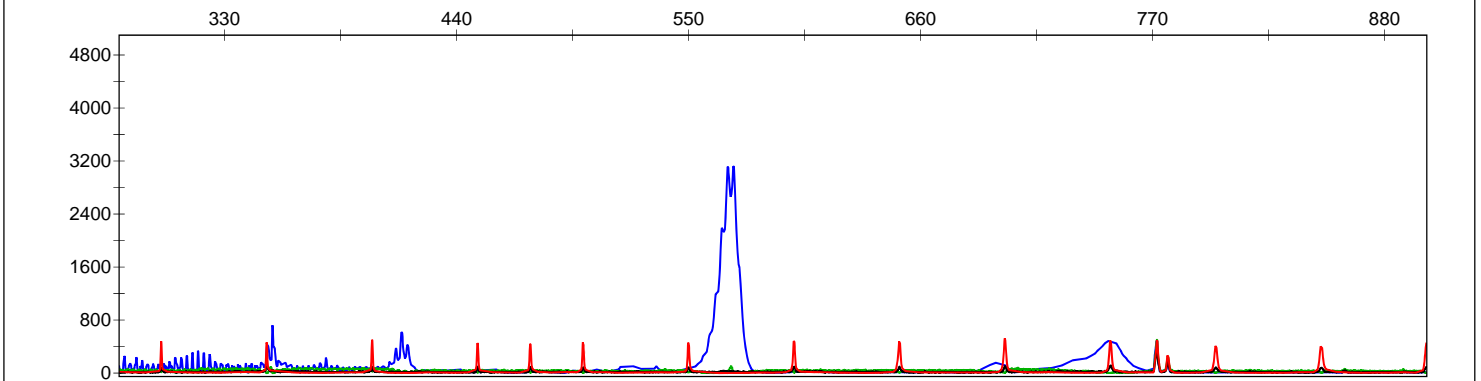

| Sample File       | Sample Name | Panel        | OS                                   | SQ                                   |
|-------------------|-------------|--------------|--------------------------------------|--------------------------------------|
| 7-45-PM53 E06.fsa | 7-45-PM53   | R62 150-1500 | <span style="color: green;">■</span> | <span style="color: green;">■</span> |

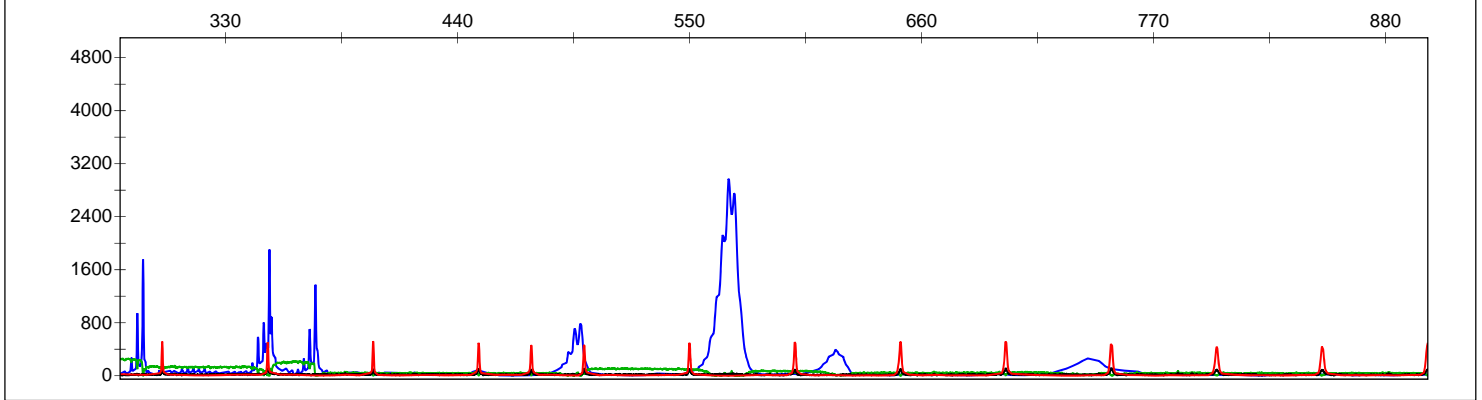

| Sample File       | Sample Name | Panel        | OS                                   | SQ                                   |
|-------------------|-------------|--------------|--------------------------------------|--------------------------------------|
| 7-46-PM54 F06.fsa | 7-46-PM54   | R62 150-1500 | <span style="color: green;">■</span> | <span style="color: green;">■</span> |

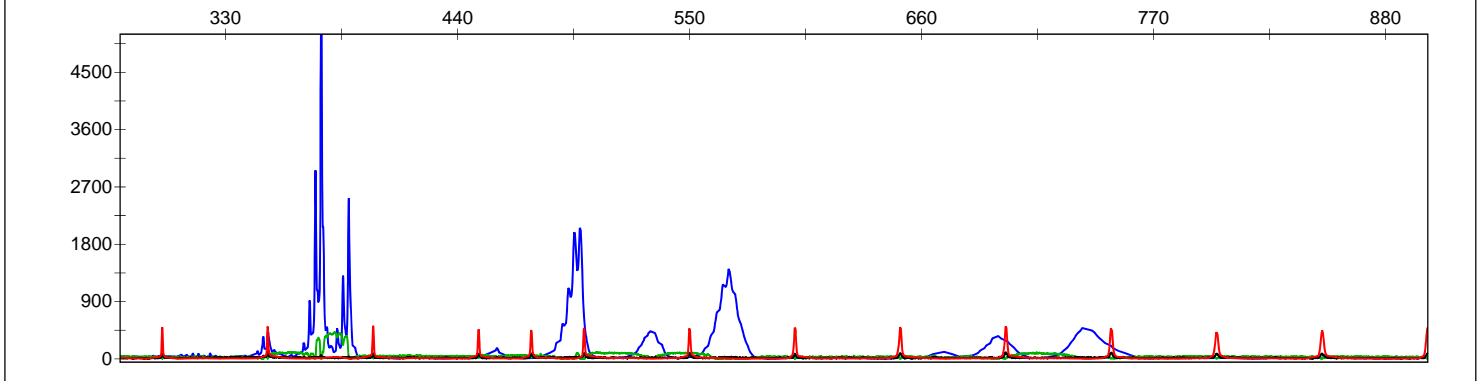

| Sample File       | Sample Name | Panel        | OS                                   | SQ                                   |
|-------------------|-------------|--------------|--------------------------------------|--------------------------------------|
| 7-47-PM55 G06.fsa | 7-47-PM55   | R62 150-1500 | <span style="color: green;">■</span> | <span style="color: green;">■</span> |

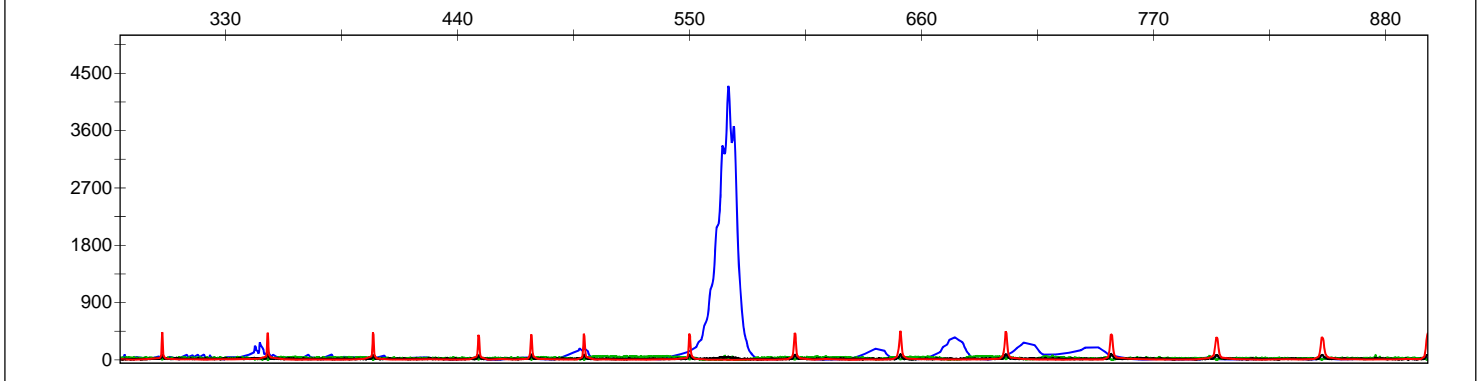

| Sample File       | Sample Name | Panel        | OS                                   | SQ                                   |
|-------------------|-------------|--------------|--------------------------------------|--------------------------------------|
| 7-48-PM56 H06.fsa | 7-48-PM56   | R62 150-1500 | <span style="color: green;">■</span> | <span style="color: green;">■</span> |

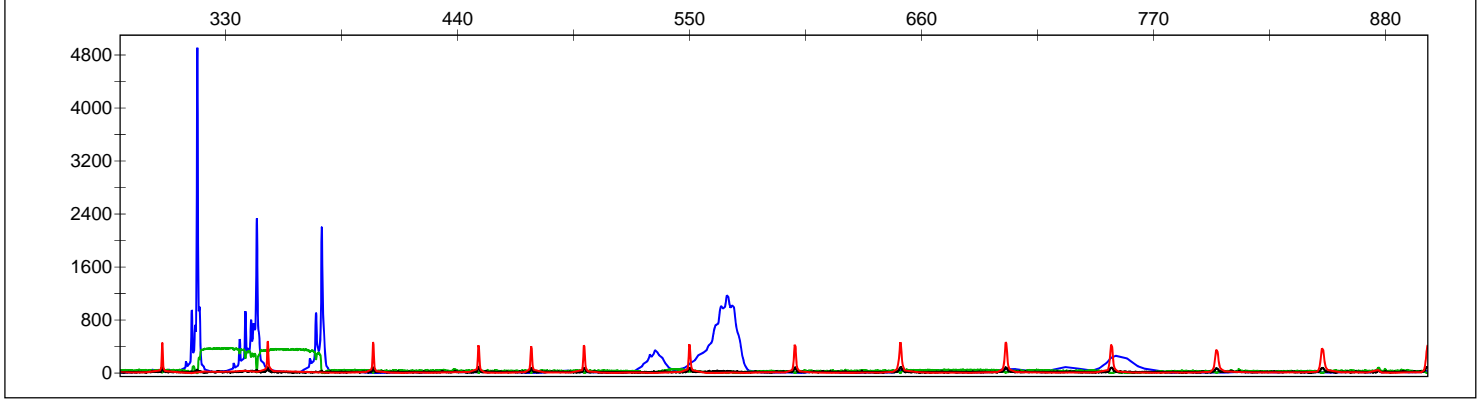

| Sample File       | Sample Name | Panel        | OS                                   | SQ                                   |
|-------------------|-------------|--------------|--------------------------------------|--------------------------------------|
| 7-49-PM57 A07.fsa | 7-49-PM57   | R62 150-1500 | <span style="color: green;">■</span> | <span style="color: green;">■</span> |

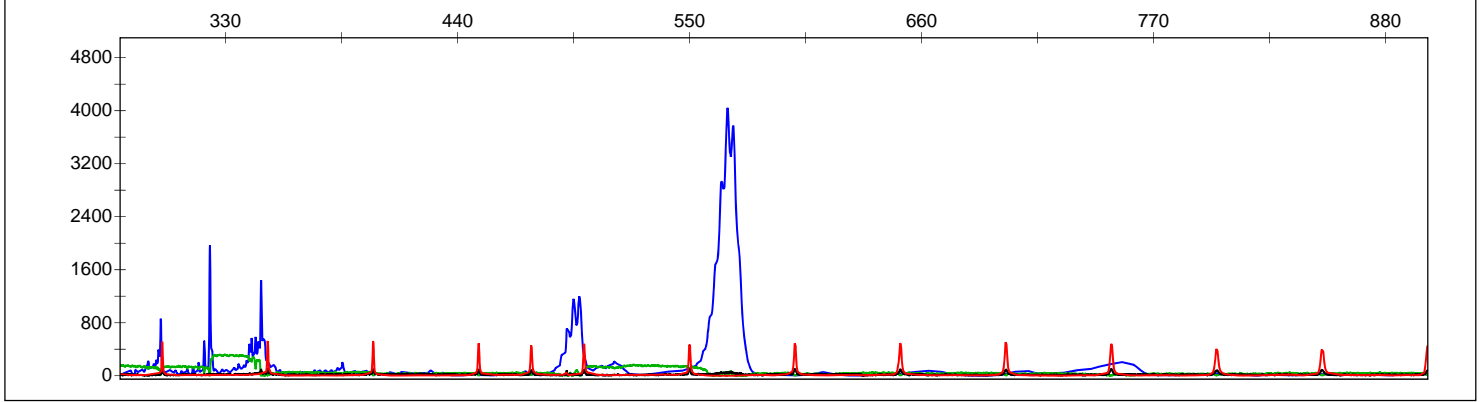

| Sample File       | Sample Name | Panel        | OS                                   | SQ                                   |
|-------------------|-------------|--------------|--------------------------------------|--------------------------------------|
| 7-50-PM58 B07.fsa | 7-50-PM58   | R62 150-1500 | <span style="color: green;">■</span> | <span style="color: green;">■</span> |

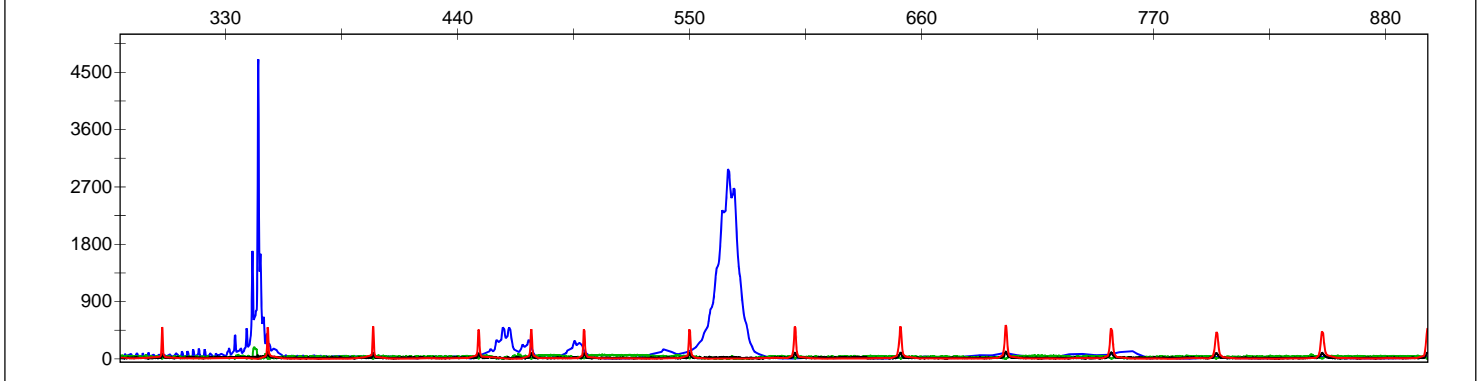

| Sample File       | Sample Name | Panel        | OS                                   | SQ                                   |
|-------------------|-------------|--------------|--------------------------------------|--------------------------------------|
| 7-51-PM59 C07.fsa | 7-51-PM59   | R62 150-1500 | <span style="color: green;">■</span> | <span style="color: green;">■</span> |

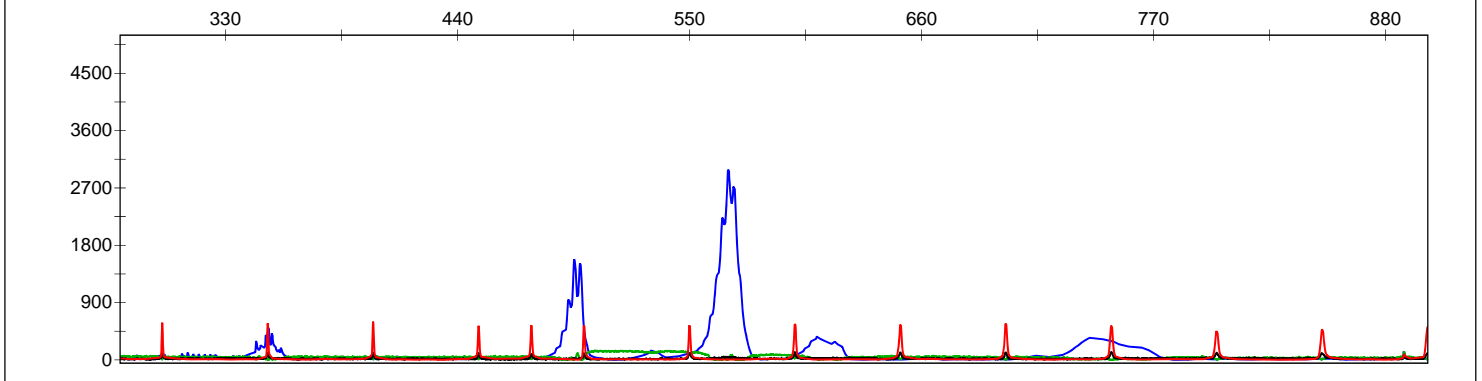

| Sample File       | Sample Name | Panel        | OS                                   | SQ                                   |
|-------------------|-------------|--------------|--------------------------------------|--------------------------------------|
| 7-52-PM60 D07.fsa | 7-52-PM60   | R62 150-1500 | <span style="color: green;">■</span> | <span style="color: green;">■</span> |

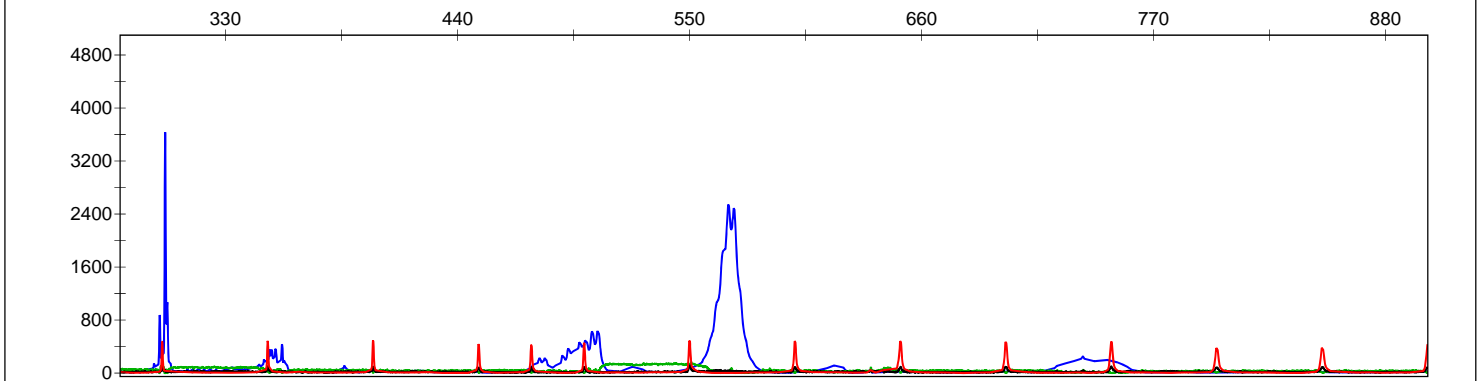

| Sample File       | Sample Name | Panel        | OS                                   | SQ                                   |
|-------------------|-------------|--------------|--------------------------------------|--------------------------------------|
| 7-53-PM61 E07.fsa | 7-53-PM61   | R62 150-1500 | <span style="color: green;">■</span> | <span style="color: green;">■</span> |

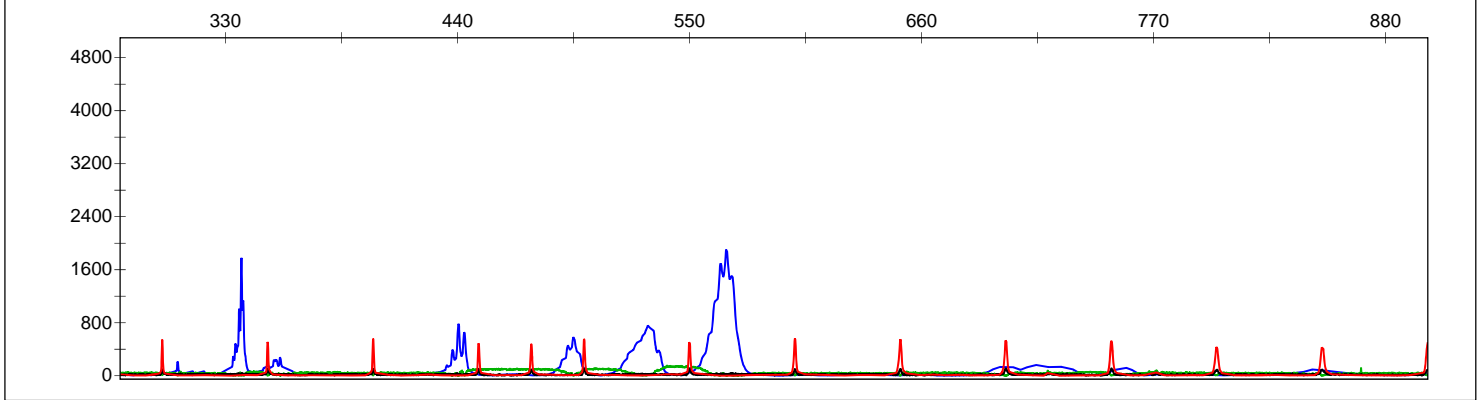

| Sample File       | Sample Name | Panel        | OS                                   | SQ                                   |
|-------------------|-------------|--------------|--------------------------------------|--------------------------------------|
| 7-54-PM62 F07.fsa | 7-54-PM62   | R62 150-1500 | <span style="color: green;">■</span> | <span style="color: green;">■</span> |

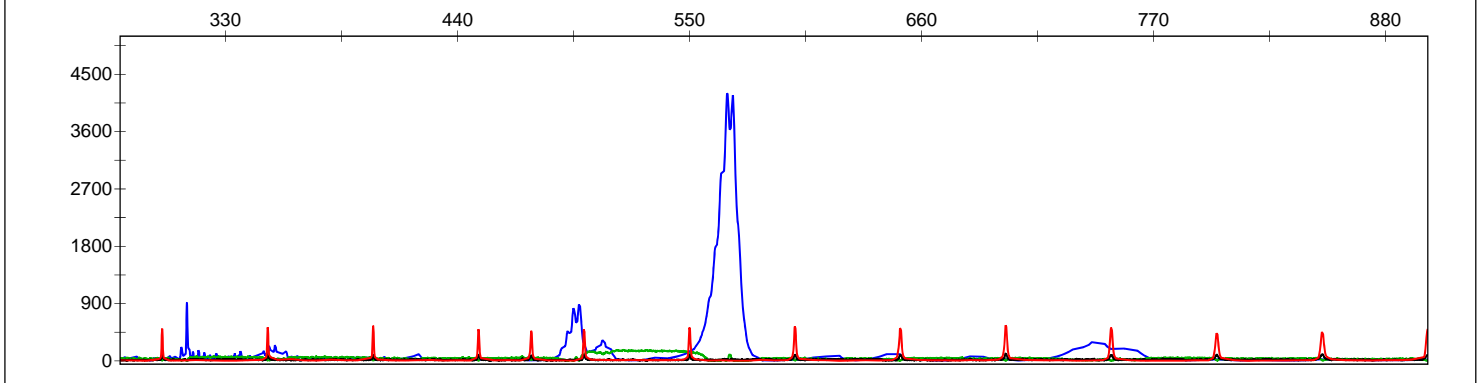

| Sample File       | Sample Name | Panel        | OS                                   | SQ                                   |
|-------------------|-------------|--------------|--------------------------------------|--------------------------------------|
| 7-55-PM63 G07.fsa | 7-55-PM63   | R62 150-1500 | <span style="color: green;">■</span> | <span style="color: green;">■</span> |

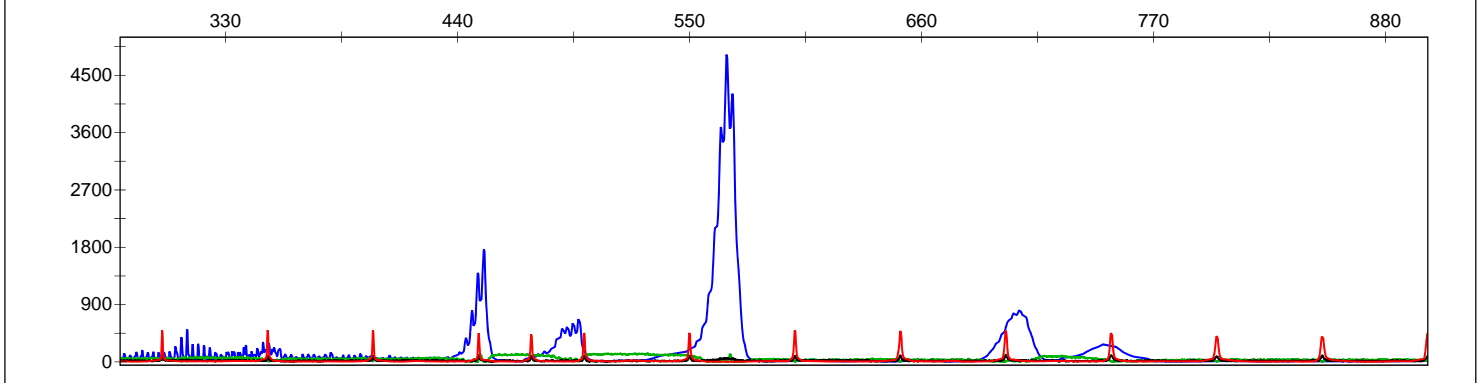

| Sample File       | Sample Name | Panel        | OS                                   | SQ                                   |
|-------------------|-------------|--------------|--------------------------------------|--------------------------------------|
| 7-56-PM64 H07.fsa | 7-56-PM64   | R62 150-1500 | <span style="color: green;">■</span> | <span style="color: green;">■</span> |

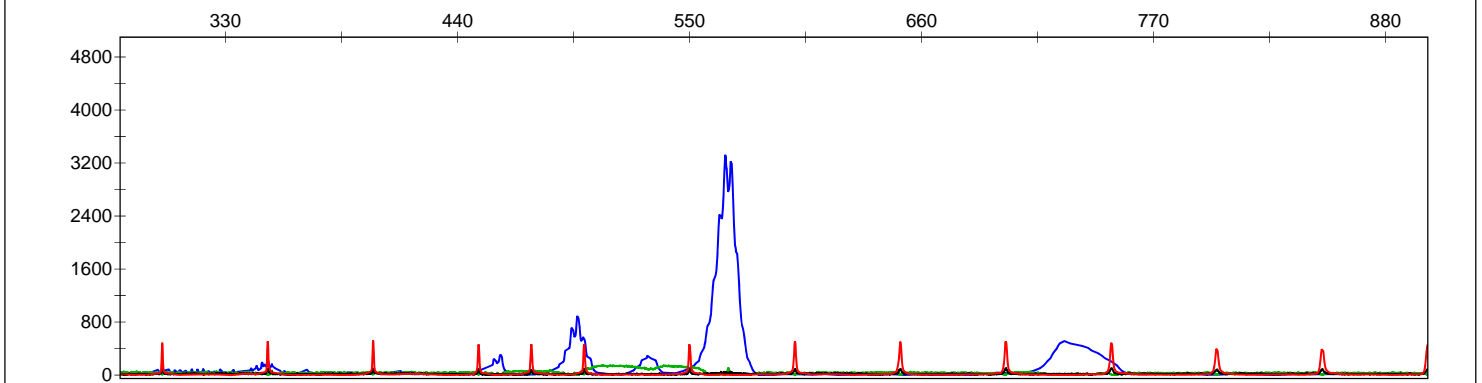

| Sample File       | Sample Name | Panel        | OS                                   | SQ                                   |
|-------------------|-------------|--------------|--------------------------------------|--------------------------------------|
| 7-57-PM65 A08.fsa | 7-57-PM65   | R62 150-1500 | <span style="color: green;">■</span> | <span style="color: green;">■</span> |

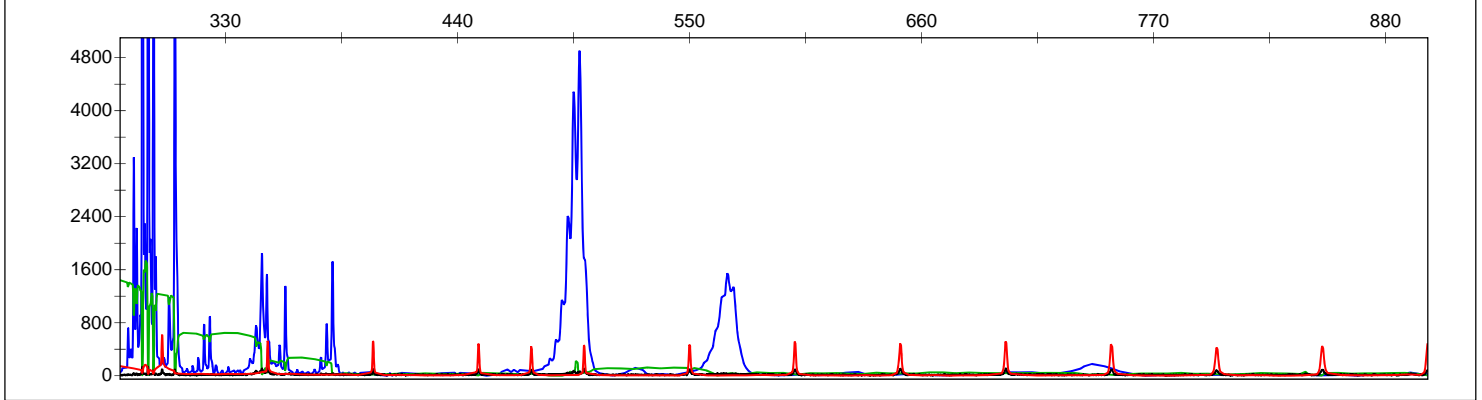

| Sample File       | Sample Name | Panel        | OS                                   | SQ                                   |
|-------------------|-------------|--------------|--------------------------------------|--------------------------------------|
| 7-58-PM66 B08.fsa | 7-58-PM66   | R62 150-1500 | <span style="color: green;">■</span> | <span style="color: green;">■</span> |

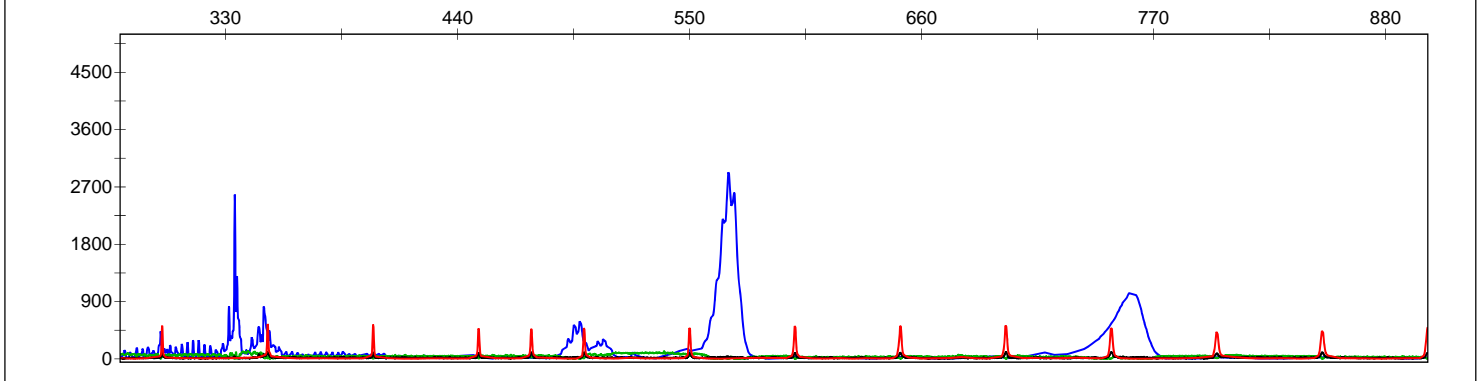

| Sample File       | Sample Name | Panel        | OS                                   | SQ                                   |
|-------------------|-------------|--------------|--------------------------------------|--------------------------------------|
| 7-59-PM67 C08.fsa | 7-59-PM67   | R62 150-1500 | <span style="color: green;">■</span> | <span style="color: green;">■</span> |

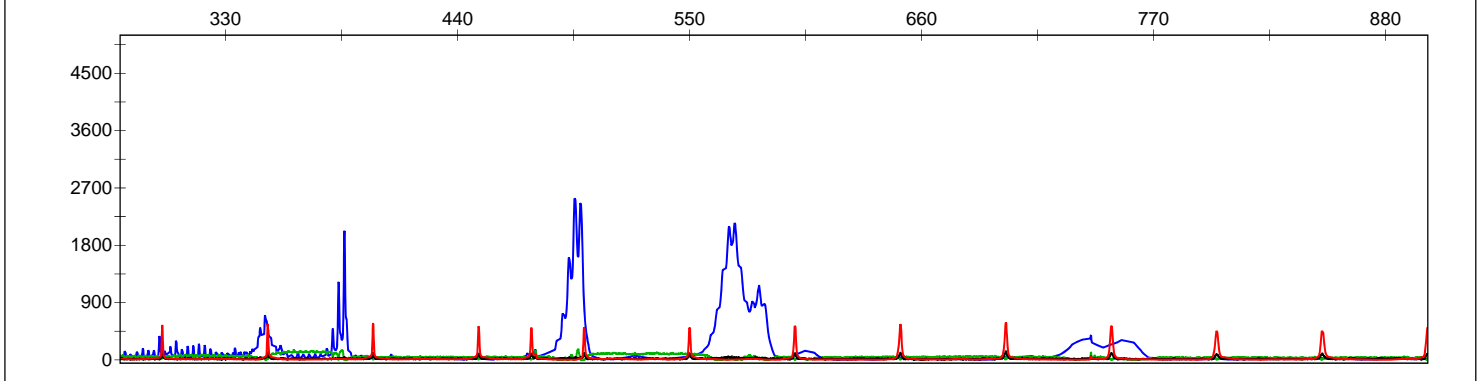

| Sample File       | Sample Name | Panel        | OS                                   | SQ                                   |
|-------------------|-------------|--------------|--------------------------------------|--------------------------------------|
| 7-60-PM68 D08.fsa | 7-60-PM68   | R62 150-1500 | <span style="color: green;">■</span> | <span style="color: green;">■</span> |

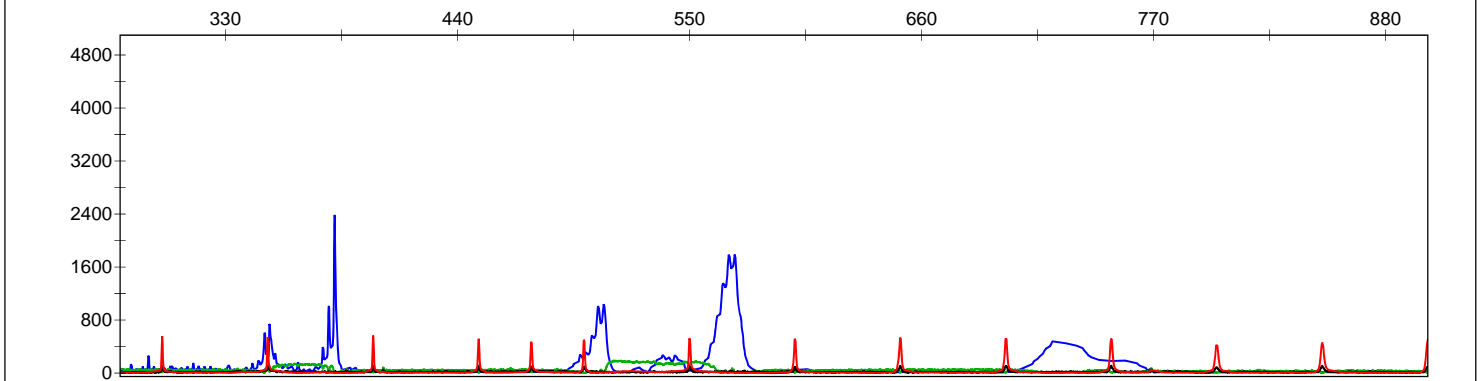

| Sample File       | Sample Name | Panel        | OS | SQ |
|-------------------|-------------|--------------|----|----|
| 7-61-PM69 E08.fsa | 7-61-PM69   | R62 150-1500 | ▲  | ■  |

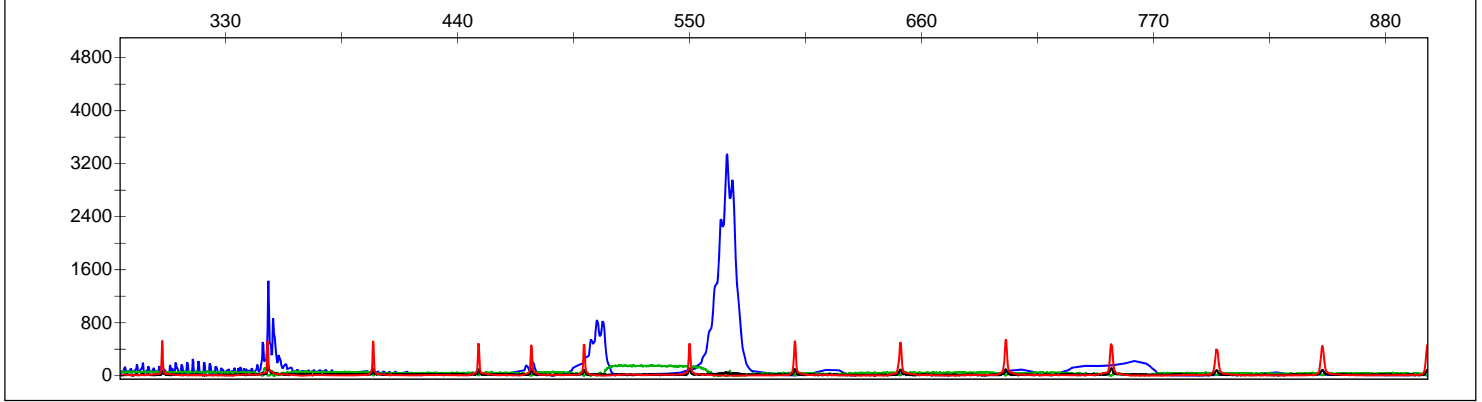

| Sample File     | Sample Name | Panel       | OS | SQ |
|-----------------|-------------|-------------|----|----|
| 7-62-N2 F08.fsa | 7-62-N2     | R62 150-550 | ▲  | ■  |

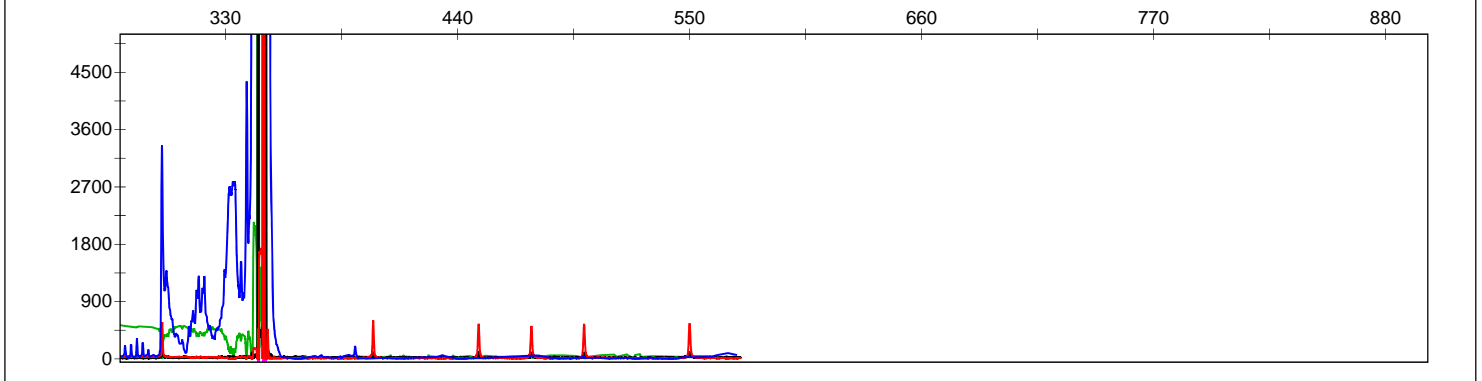

| Sample File     | Sample Name | Panel       | OS | SQ |
|-----------------|-------------|-------------|----|----|
| 7-63-N4 G08.fsa | 7-63-N4     | R62 150-550 | ▲  | ■  |

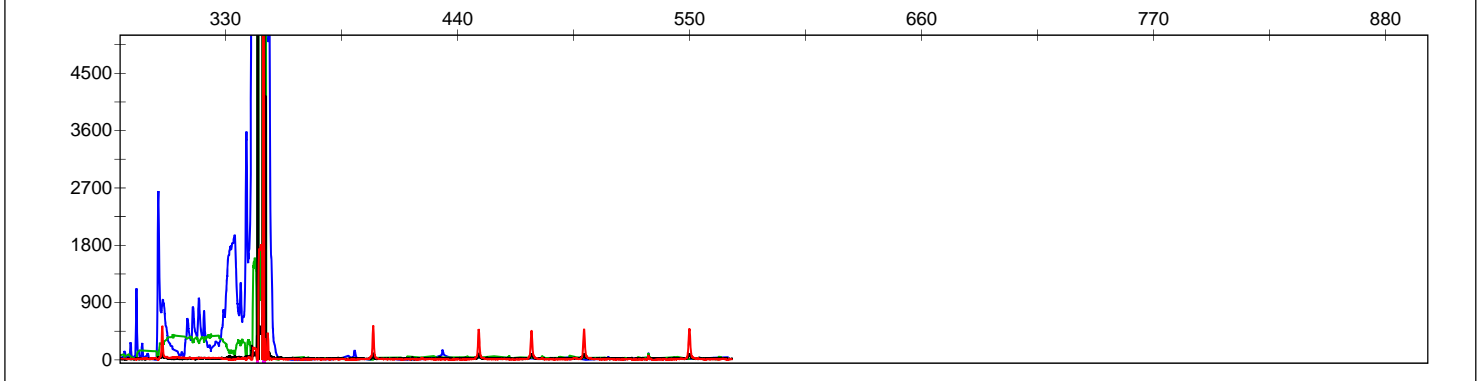

| Sample File     | Sample Name | Panel       | OS | SQ |
|-----------------|-------------|-------------|----|----|
| 7-64-N5 H08.fsa | 7-64-N5     | R62 150-550 | ▲  | ■  |

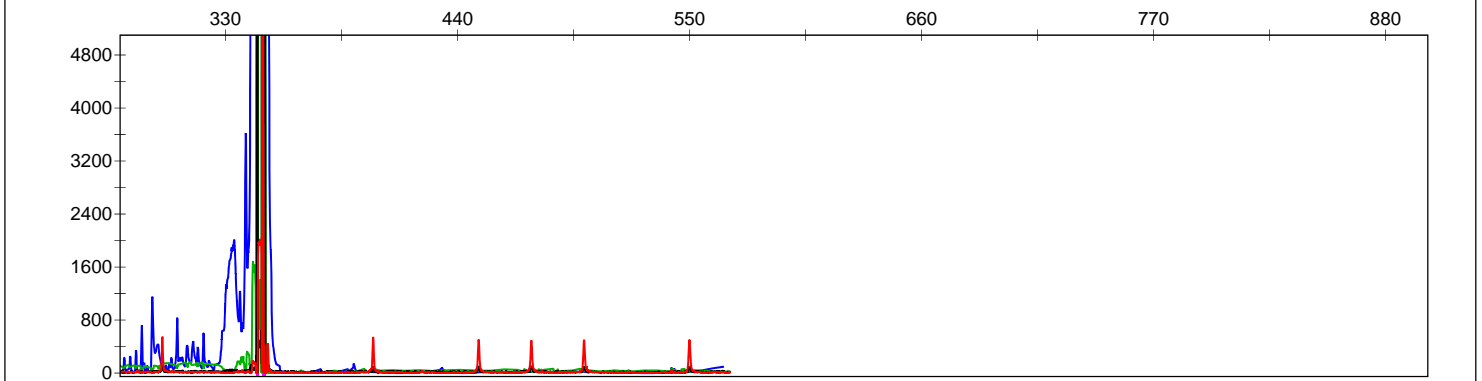

| Sample File     | Sample Name | Panel       | OS | SQ |
|-----------------|-------------|-------------|----|----|
| 7-65-N6 A09.fsa | 7-65-N6     | R62 150-550 | ▲  | ■  |

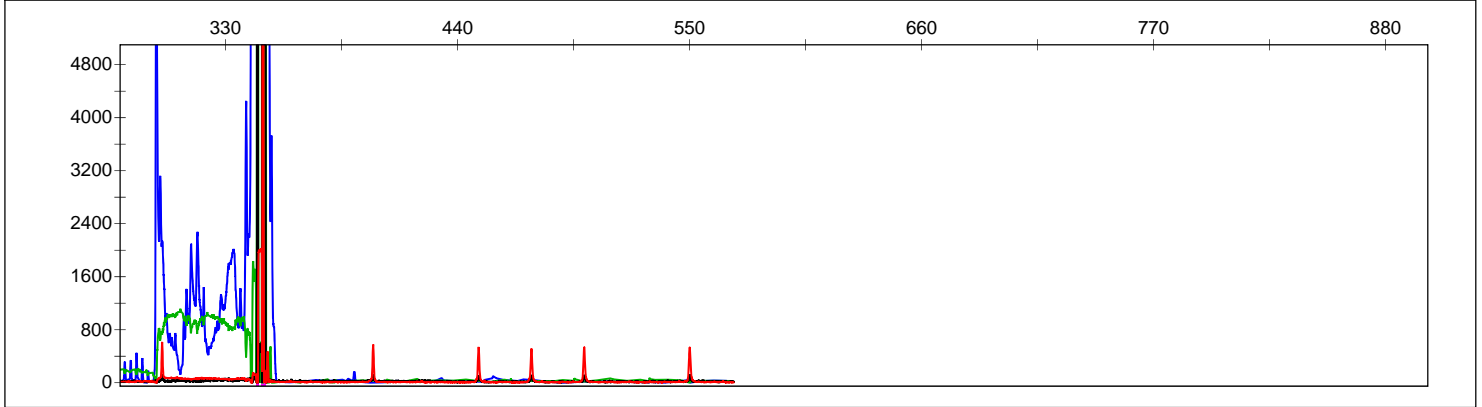

| Sample File      | Sample Name | Panel       | OS | SQ |
|------------------|-------------|-------------|----|----|
| 7-66-N10 B09.fsa | 7-66-N10    | R62 150-550 | ▲  | ■  |

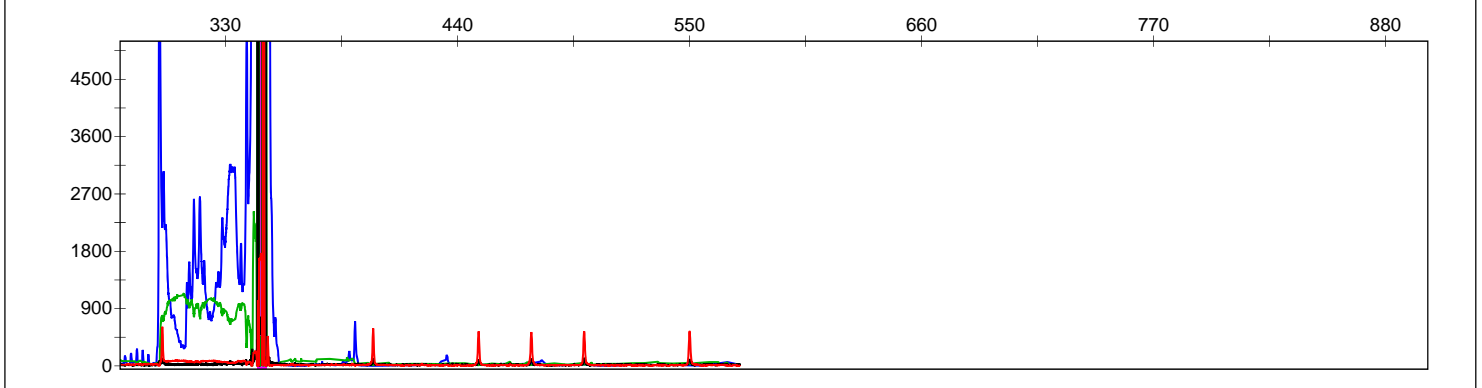

| Sample File      | Sample Name | Panel       | OS | SQ |
|------------------|-------------|-------------|----|----|
| 7-67-N13 C09.fsa | 7-67-N13    | R62 150-550 | ▲  | ■  |

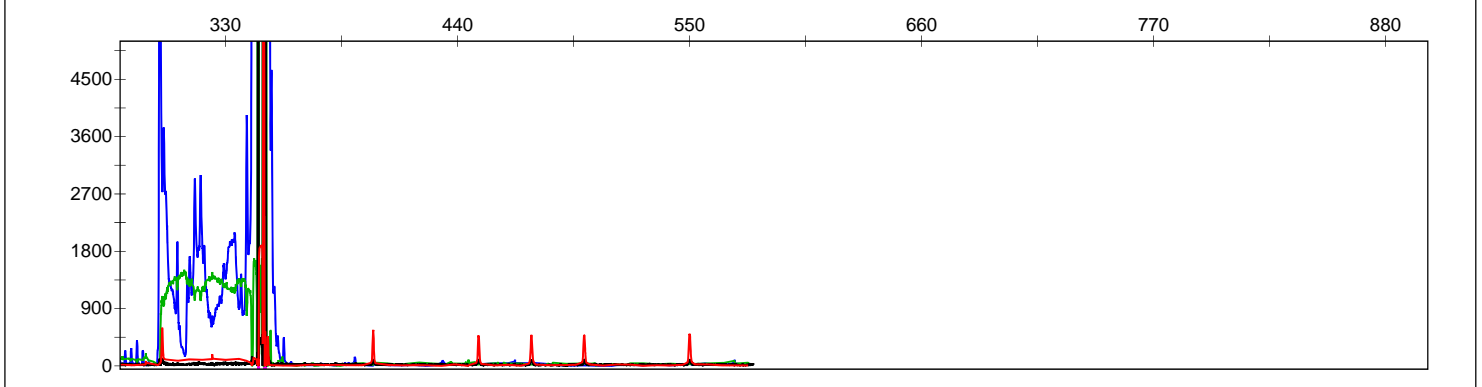

| Sample File      | Sample Name | Panel       | OS | SQ |
|------------------|-------------|-------------|----|----|
| 7-68-N14 D09.fsa | 7-68-N14    | R62 150-550 | ▲  | ■  |

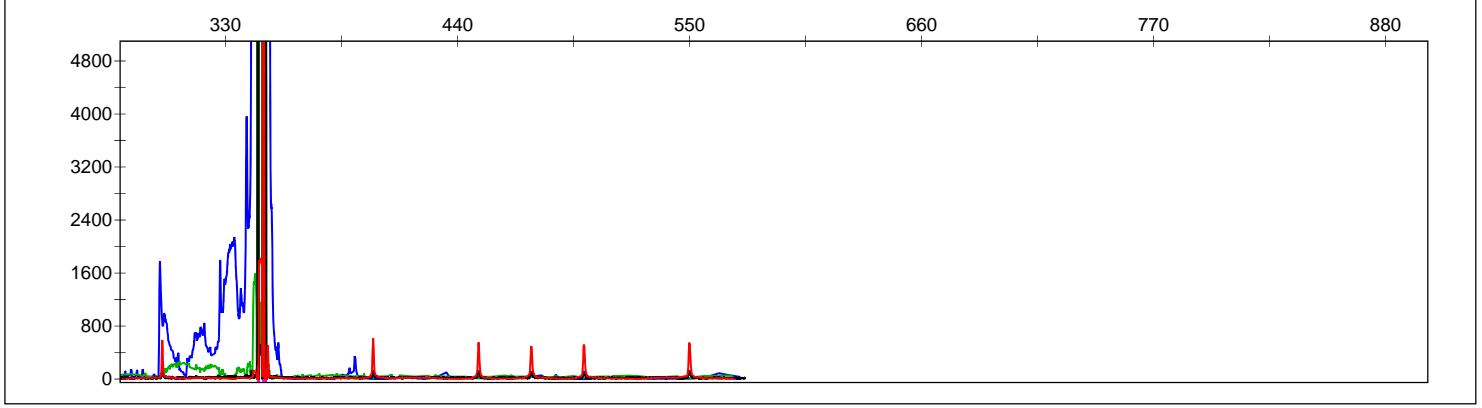



| Sample File      | Sample Name | Panel       | OS | SQ |
|------------------|-------------|-------------|----|----|
| 7-69-N16 E09.fsa | 7-69-N16    | R62 150-550 | ▲  | ■  |

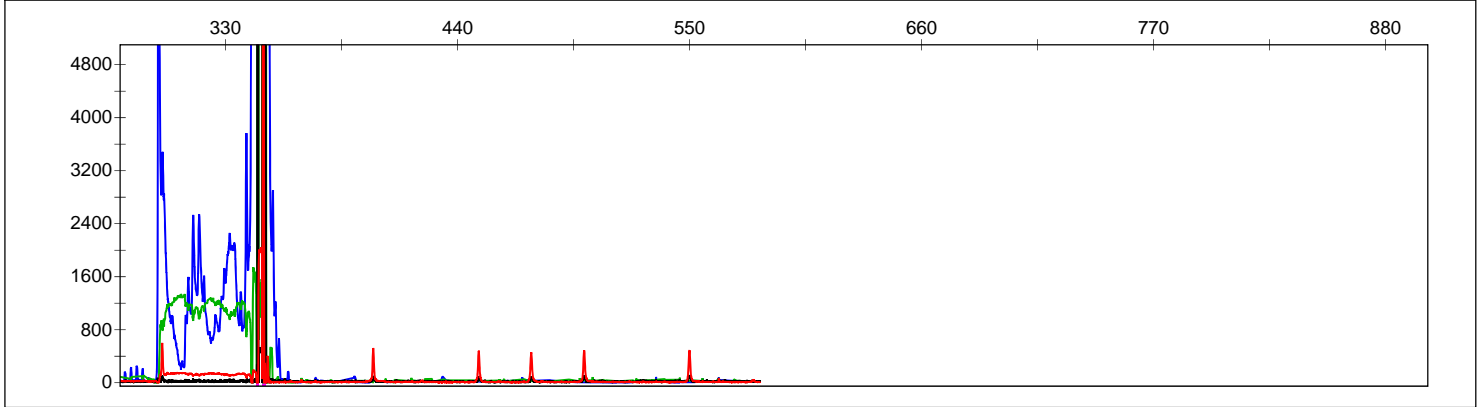

| Sample File      | Sample Name | Panel       | OS | SQ |
|------------------|-------------|-------------|----|----|
| 7-70-N17 F09.fsa | 7-70-N17    | R62 150-550 | ▲  | ■  |

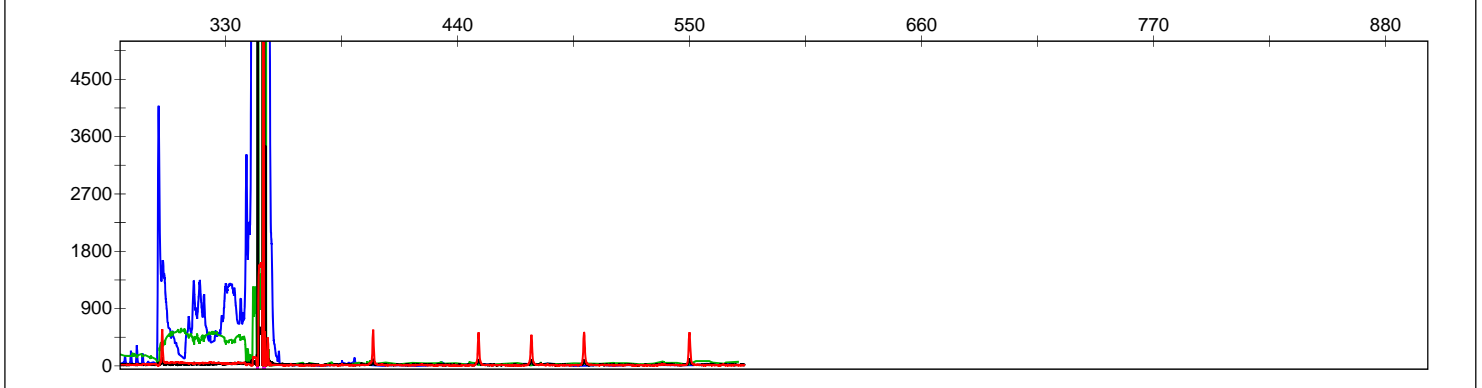

| Sample File      | Sample Name | Panel       | OS | SQ |
|------------------|-------------|-------------|----|----|
| 7-71-N18 G09.fsa | 7-71-N18    | R62 150-550 | ▲  | ■  |

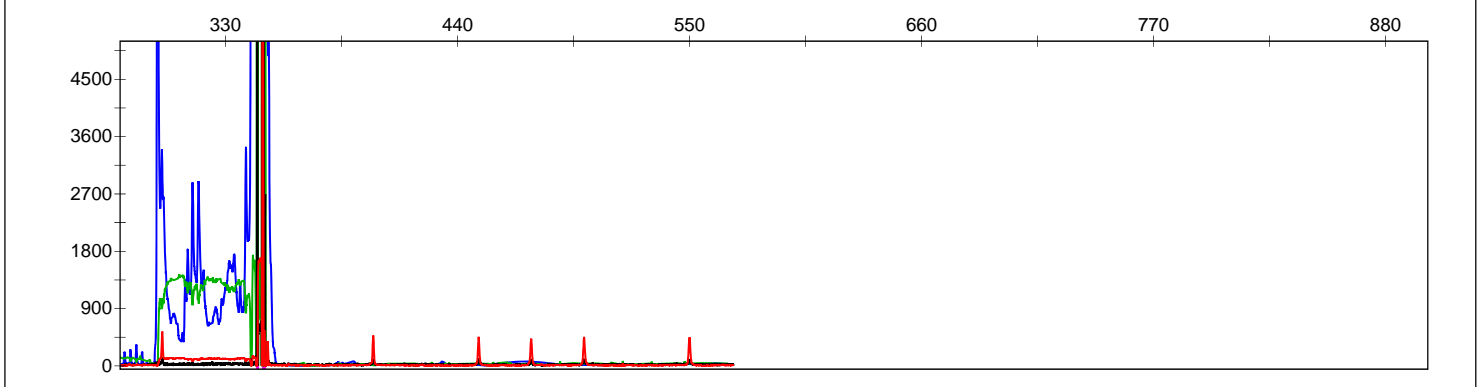

| Sample File      | Sample Name | Panel       | OS | SQ |
|------------------|-------------|-------------|----|----|
| 7-72-N19 H09.fsa | 7-72-N19    | R62 150-550 | ▲  | ■  |

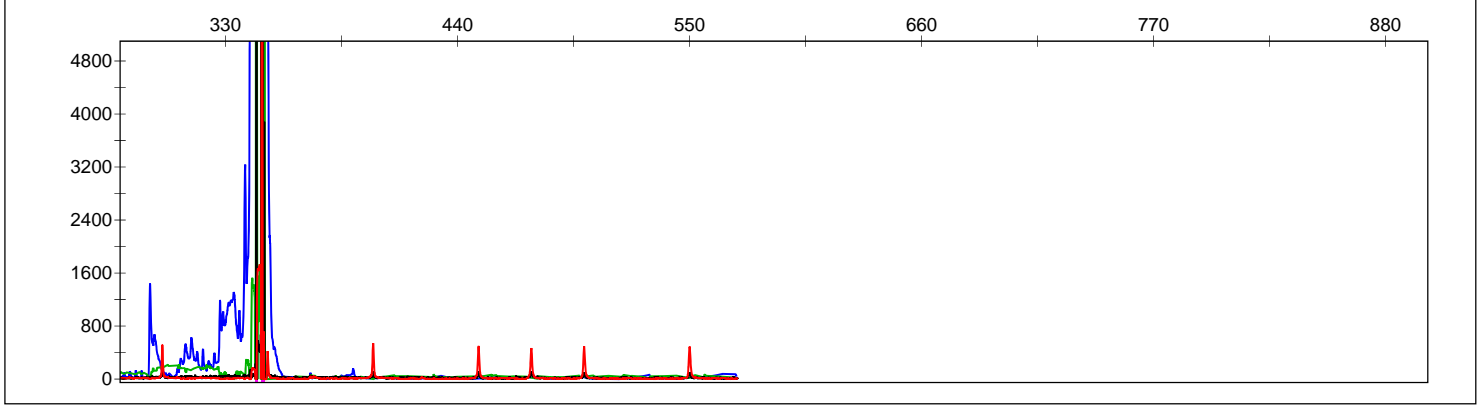

| Sample File      | Sample Name | Panel       | OS | SQ |
|------------------|-------------|-------------|----|----|
| 7-73-N20 A10.fsa | 7-73-N20    | R62 150-550 | ▲  | ■  |

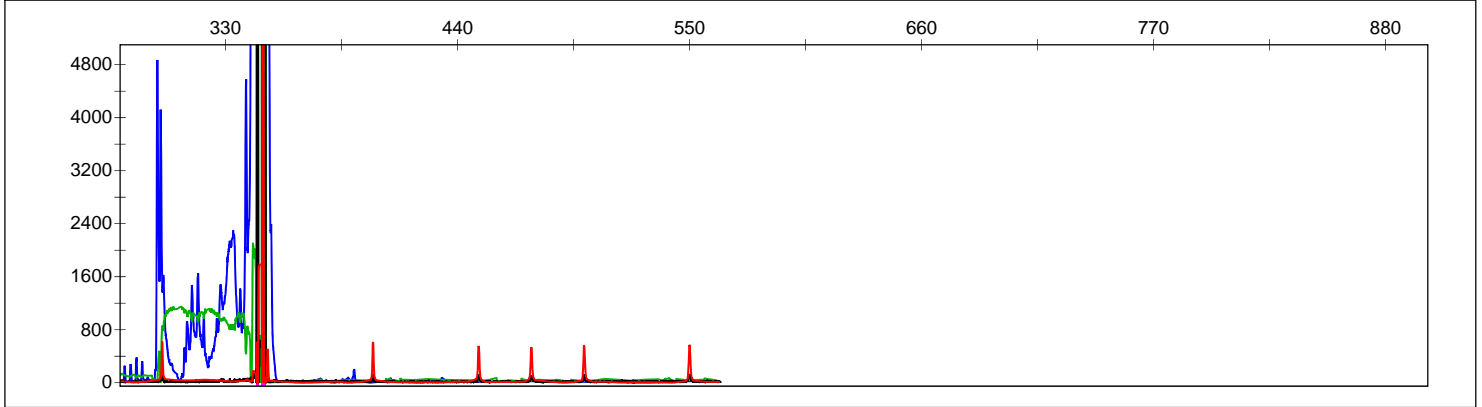

| Sample File      | Sample Name | Panel       | OS | SQ |
|------------------|-------------|-------------|----|----|
| 7-74-N23 B10.fsa | 7-74-N23    | R62 150-550 | ▲  | ■  |

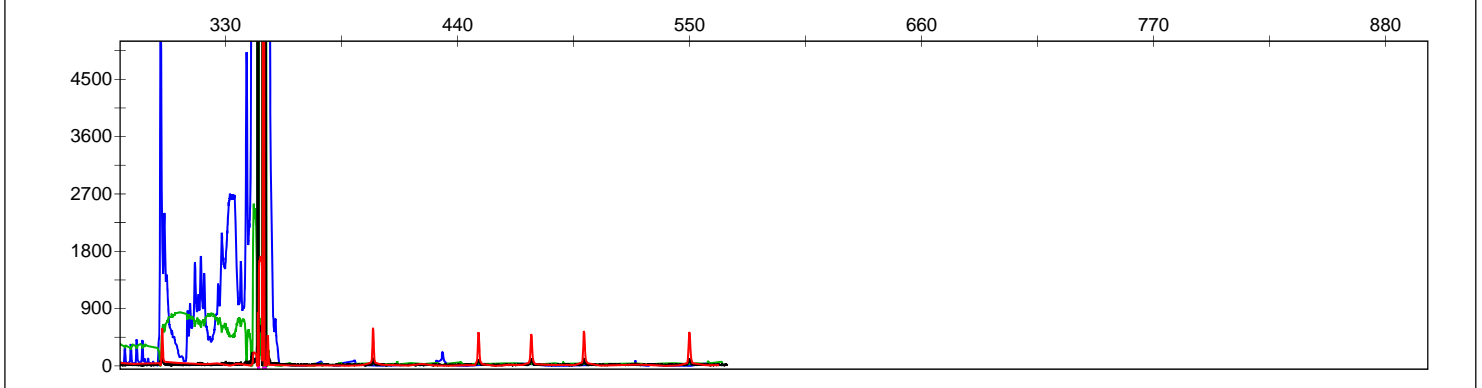

| Sample File      | Sample Name | Panel       | OS | SQ |
|------------------|-------------|-------------|----|----|
| 7-75-N24 C10.fsa | 7-75-N24    | R62 150-550 | ▲  | ■  |

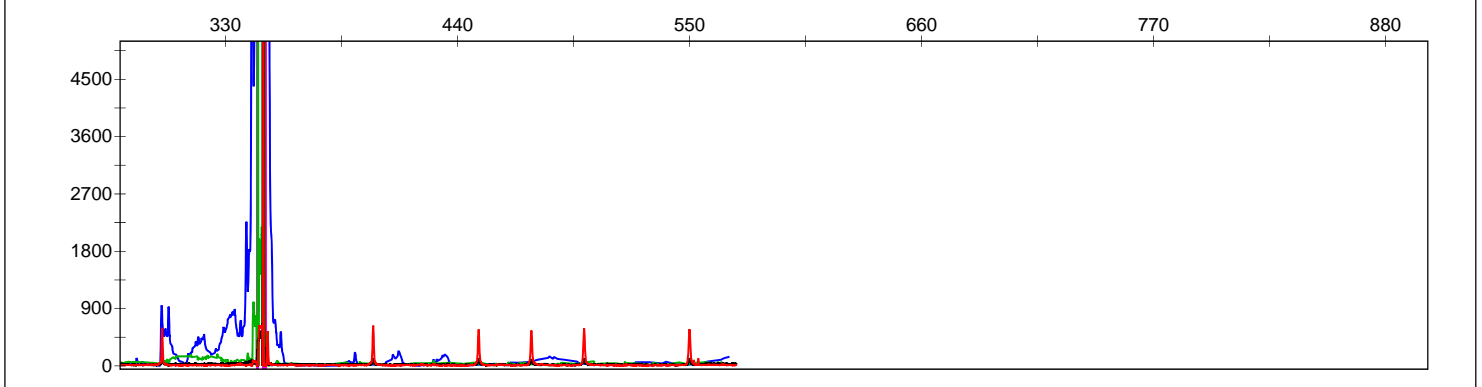

| Sample File      | Sample Name | Panel       | OS | SQ |
|------------------|-------------|-------------|----|----|
| 7-76-N25 D10.fsa | 7-76-N25    | R62 150-550 | ▲  | ■  |

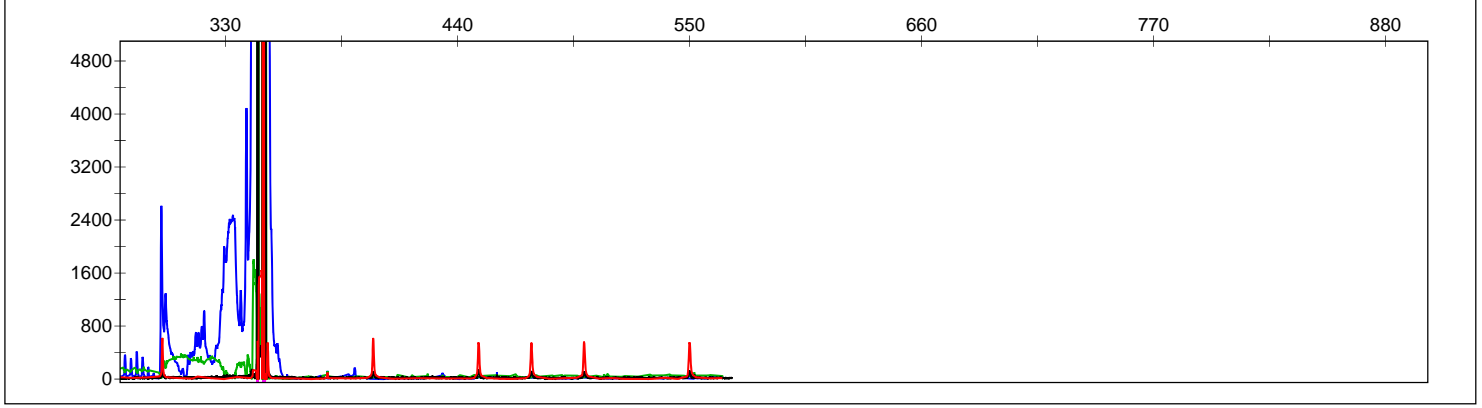

| Sample File      | Sample Name | Panel       | OS | SQ |
|------------------|-------------|-------------|----|----|
| 7-77-N28 E10.fsa | 7-77-N28    | R62 150-550 | ▲  | ■  |

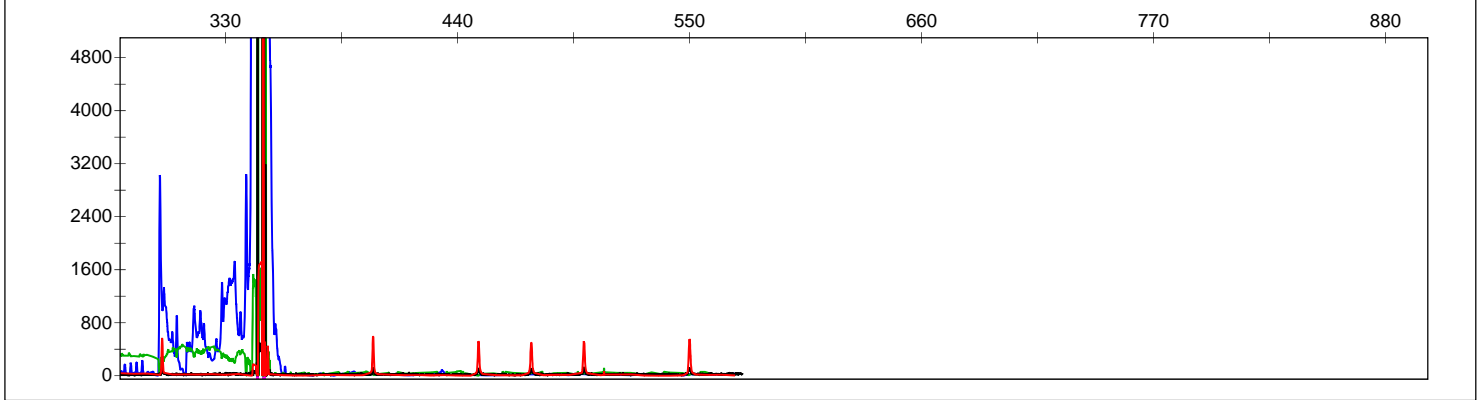

| Sample File      | Sample Name | Panel       | OS | SQ |
|------------------|-------------|-------------|----|----|
| 7-78-N29 F10.fsa | 7-78-N29    | R62 150-550 | ▲  | ■  |

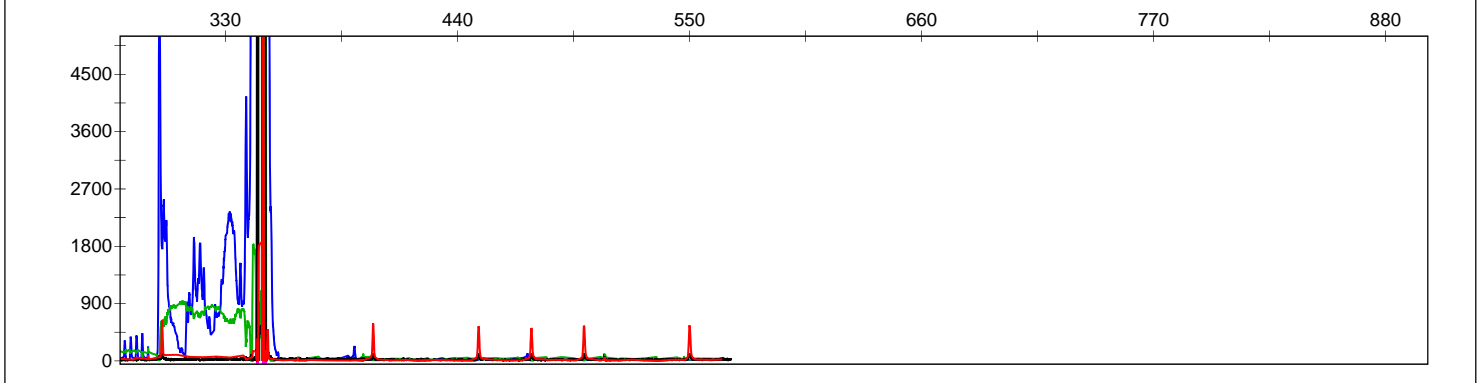

| Sample File      | Sample Name | Panel       | OS | SQ |
|------------------|-------------|-------------|----|----|
| 7-79-N31 G10.fsa | 7-79-N31    | R62 150-550 | ▲  | ■  |

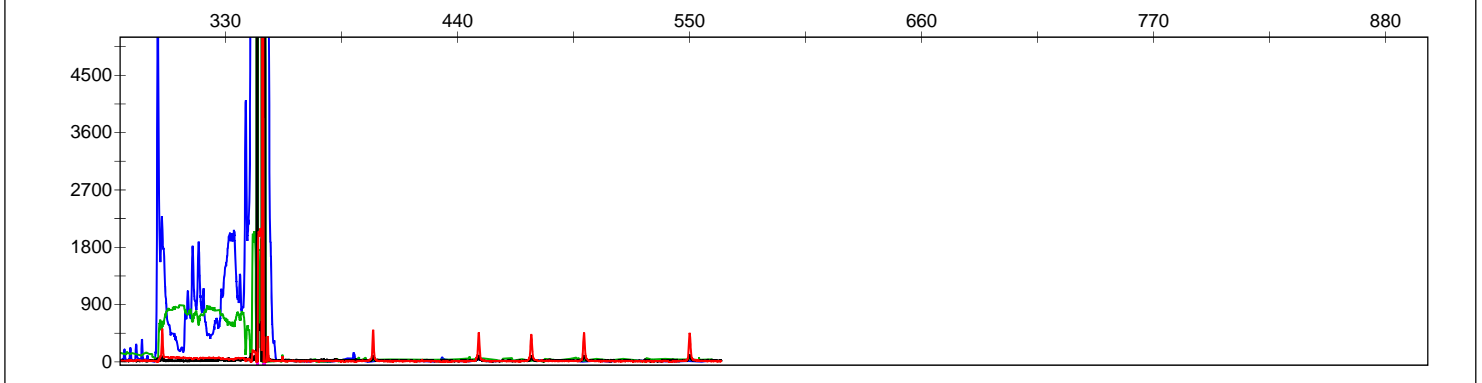

| Sample File      | Sample Name | Panel       | OS | SQ |
|------------------|-------------|-------------|----|----|
| 7-80-N32 H10.fsa | 7-80-N32    | R62 150-550 | ▲  | ■  |

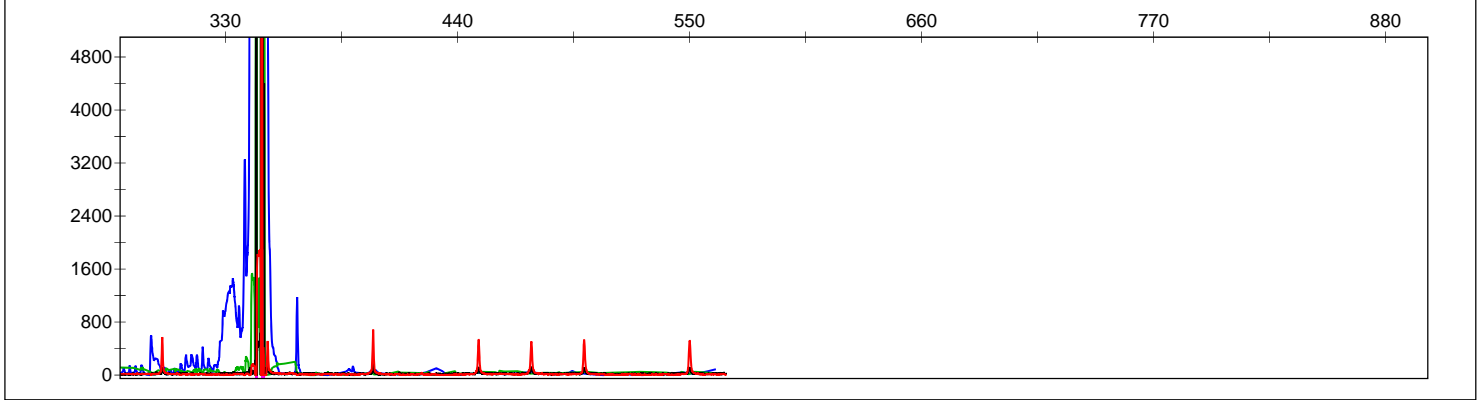

| Sample File      | Sample Name | Panel       | OS | SQ |
|------------------|-------------|-------------|----|----|
| 7-81-N33 A11.fsa | 7-81-N33    | R62 150-550 | ▲  | ■  |

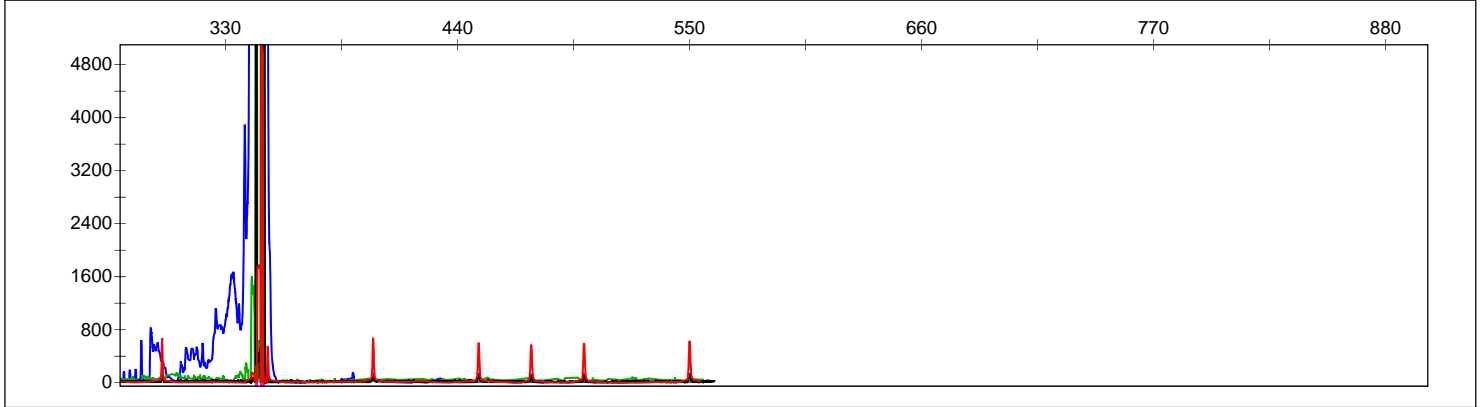

| Sample File      | Sample Name | Panel       | OS | SQ |
|------------------|-------------|-------------|----|----|
| 7-82-N34 B11.fsa | 7-82-N34    | R62 150-550 | ▲  | ■  |

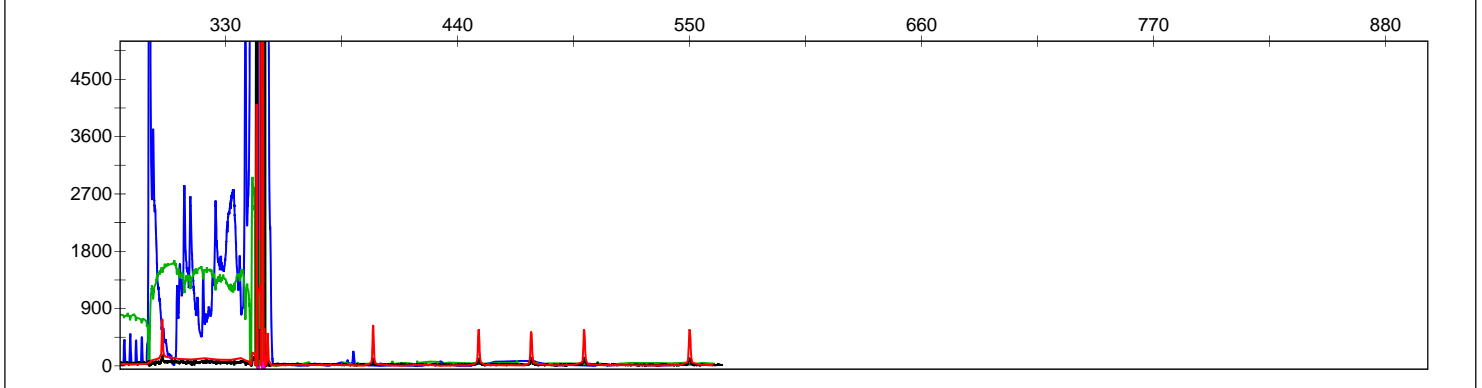

| Sample File      | Sample Name | Panel       | OS | SQ |
|------------------|-------------|-------------|----|----|
| 7-83-N41 C11.fsa | 7-83-N41    | R62 150-550 | ▲  | ■  |

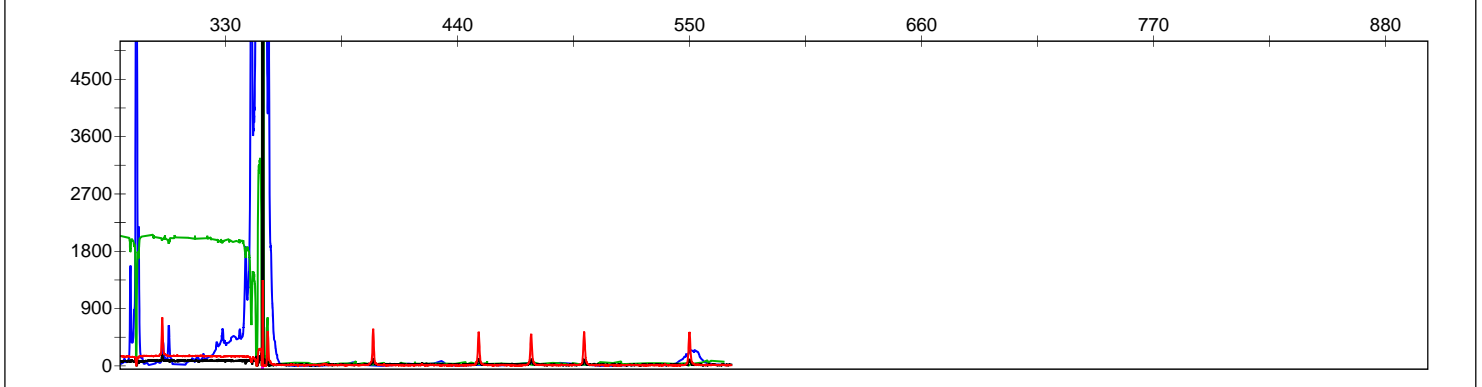

| Sample File      | Sample Name | Panel       | OS | SQ |
|------------------|-------------|-------------|----|----|
| 7-84-N43 D11.fsa | 7-84-N43    | R62 150-550 | ▲  | ■  |

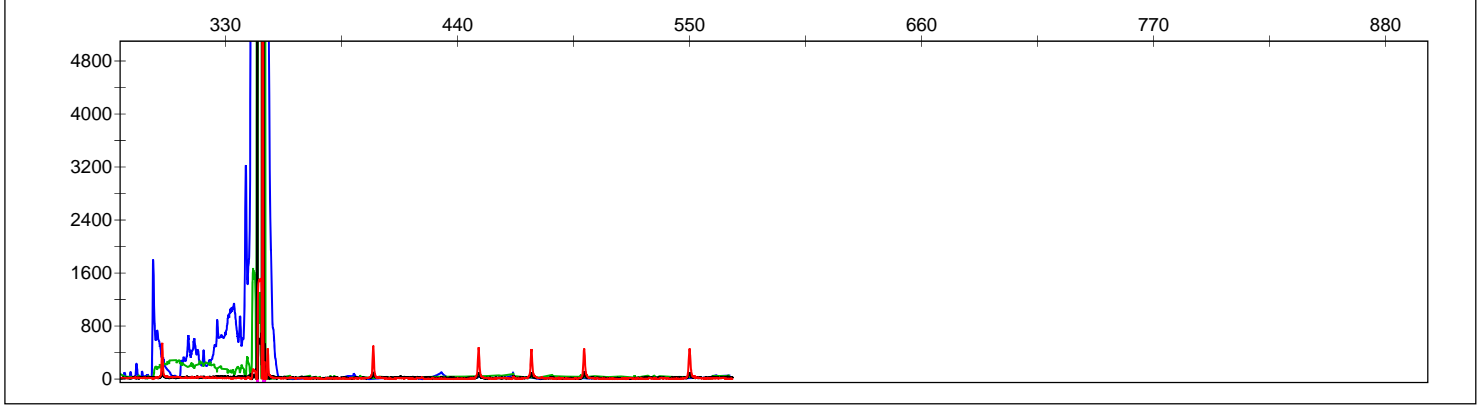

| Sample File      | Sample Name | Panel       | OS | SQ |
|------------------|-------------|-------------|----|----|
| 7-85-N44 E11.fsa | 7-85-N44    | R62 150-550 | ▲  | ■  |

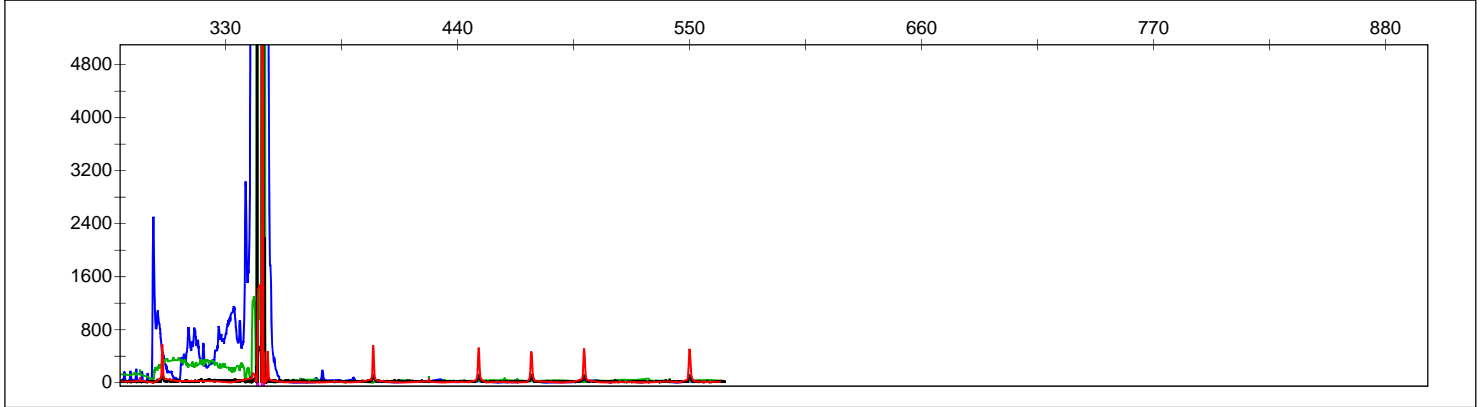

| Sample File      | Sample Name | Panel       | OS | SQ |
|------------------|-------------|-------------|----|----|
| 7-86-N46 F11.fsa | 7-86-N46    | R62 150-550 | ▲  | ■  |

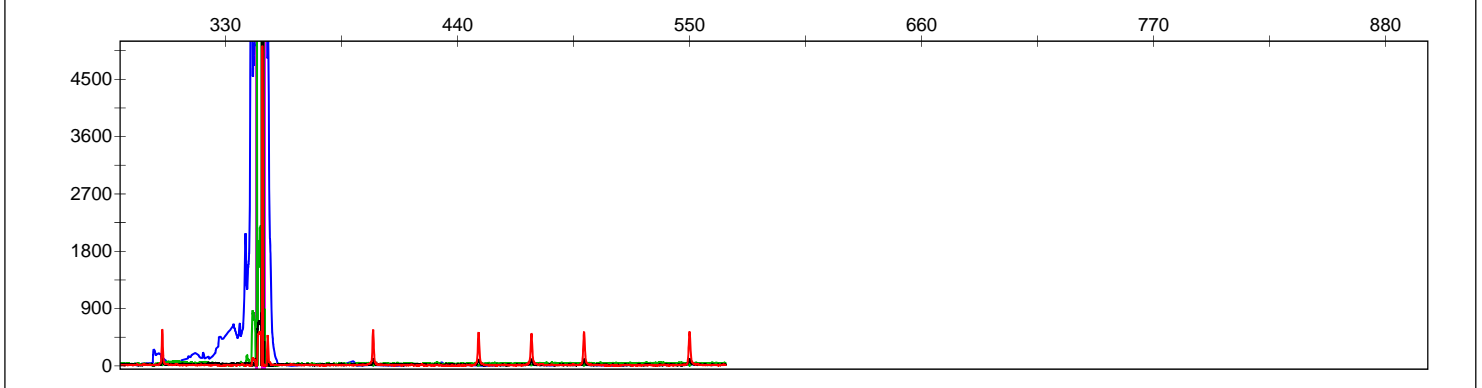

| Sample File      | Sample Name | Panel       | OS | SQ |
|------------------|-------------|-------------|----|----|
| 7-87-N48 G11.fsa | 7-87-N48    | R62 150-550 | ▲  | ■  |

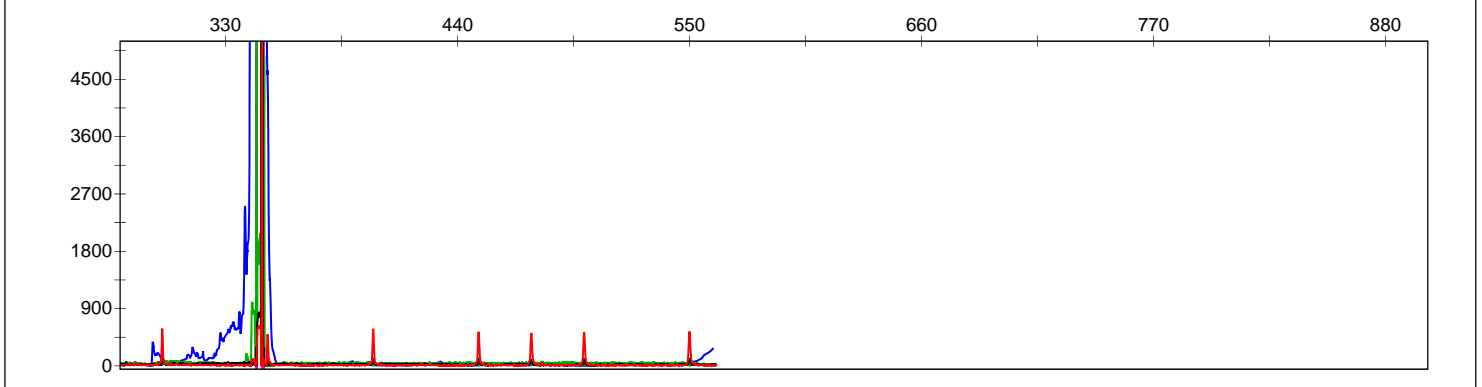

| Sample File      | Sample Name | Panel       | OS | SQ |
|------------------|-------------|-------------|----|----|
| 7-88-N49 H11.fsa | 7-88-N49    | R62 150-550 | ▲  | ■  |

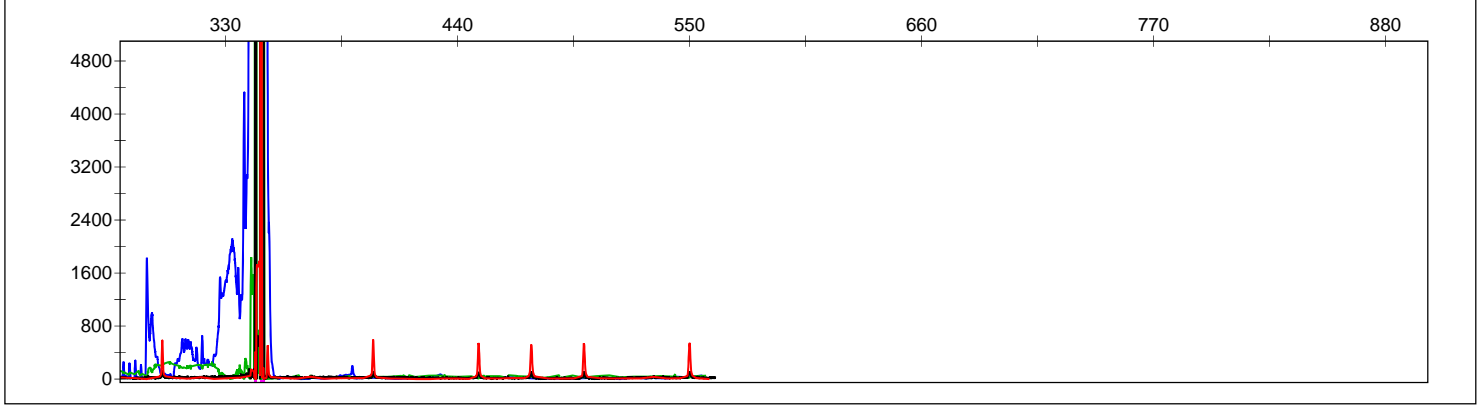

| Sample File      | Sample Name | Panel       | OS | SQ |
|------------------|-------------|-------------|----|----|
| 7-89-N51 A12.fsa | 7-89-N51    | R62 150-550 | ▲  | ■  |

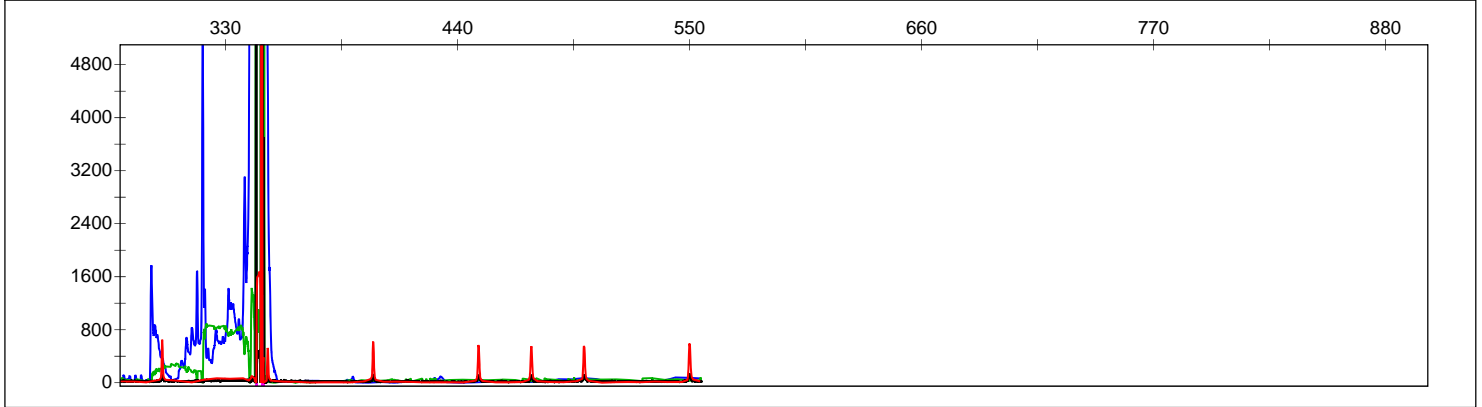

| Sample File      | Sample Name | Panel       | OS | SQ |
|------------------|-------------|-------------|----|----|
| 7-90-N52 B12.fsa | 7-90-N52    | R62 150-550 | ▲  | ■  |

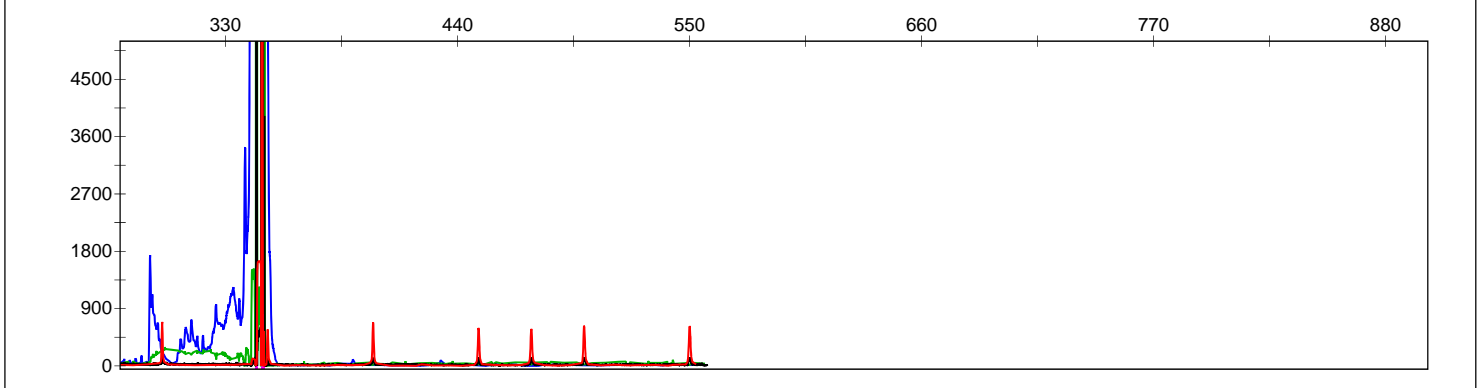

| Sample File      | Sample Name | Panel       | OS | SQ |
|------------------|-------------|-------------|----|----|
| 7-91-N54 C12.fsa | 7-91-N54    | R62 150-550 | ▲  | ■  |

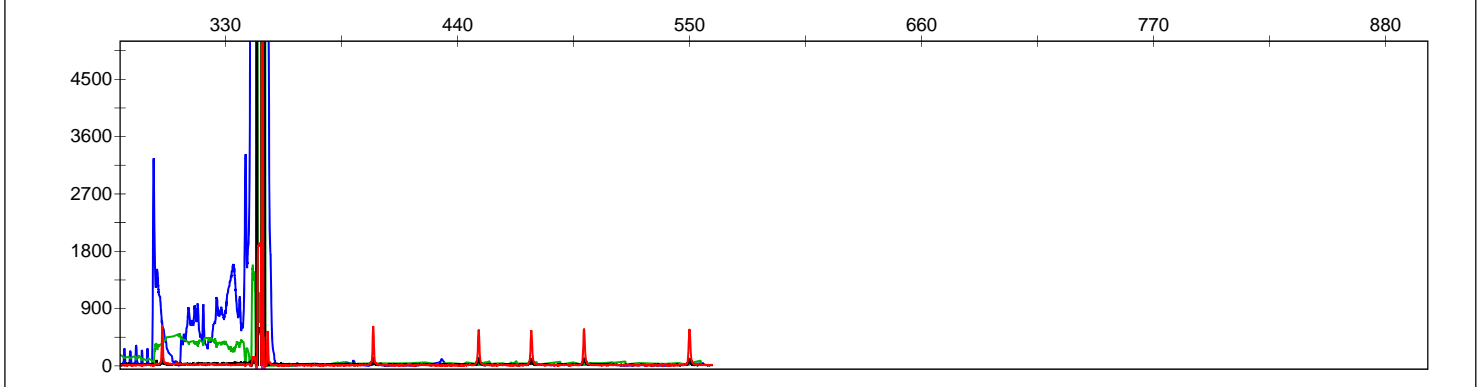

| Sample File      | Sample Name | Panel       | OS | SQ |
|------------------|-------------|-------------|----|----|
| 7-92-N57 D12.fsa | 7-92-N57    | R62 150-550 | ▲  | ■  |

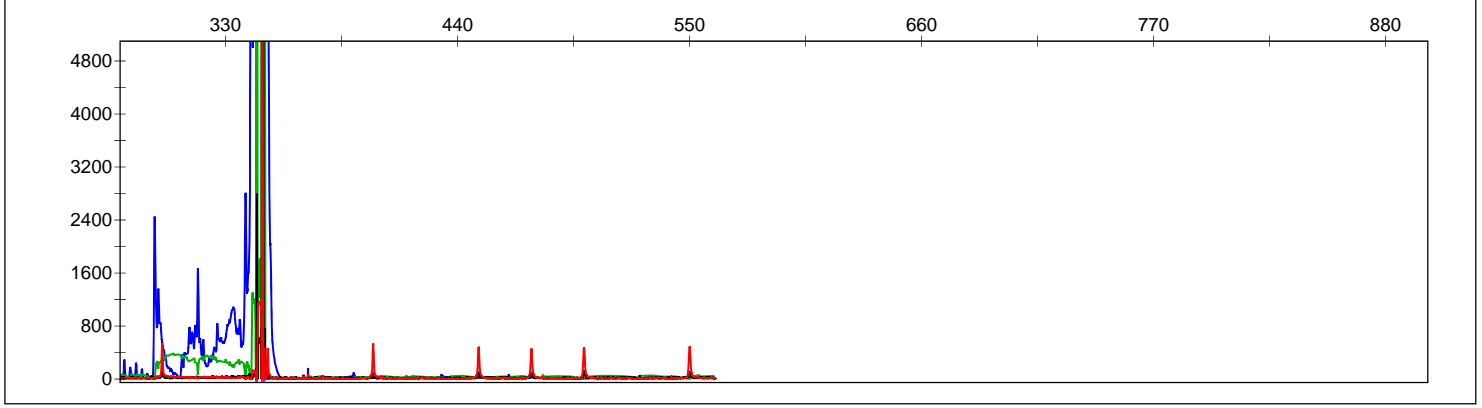

| Sample File      | Sample Name | Panel       | OS | SQ |
|------------------|-------------|-------------|----|----|
| 7-93-N60 E12.fsa | 7-93-N60    | R62 150-550 | ▲  | ■  |

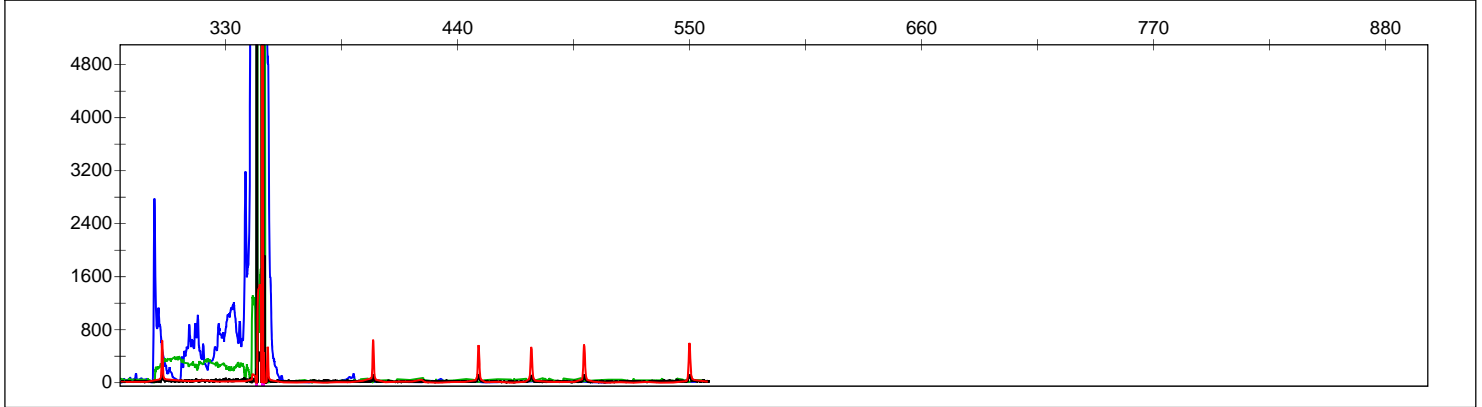

| Sample File      | Sample Name | Panel       | OS | SQ |
|------------------|-------------|-------------|----|----|
| 7-94-N67 F12.fsa | 7-94-N67    | R62 150-550 | ▲  | ■  |

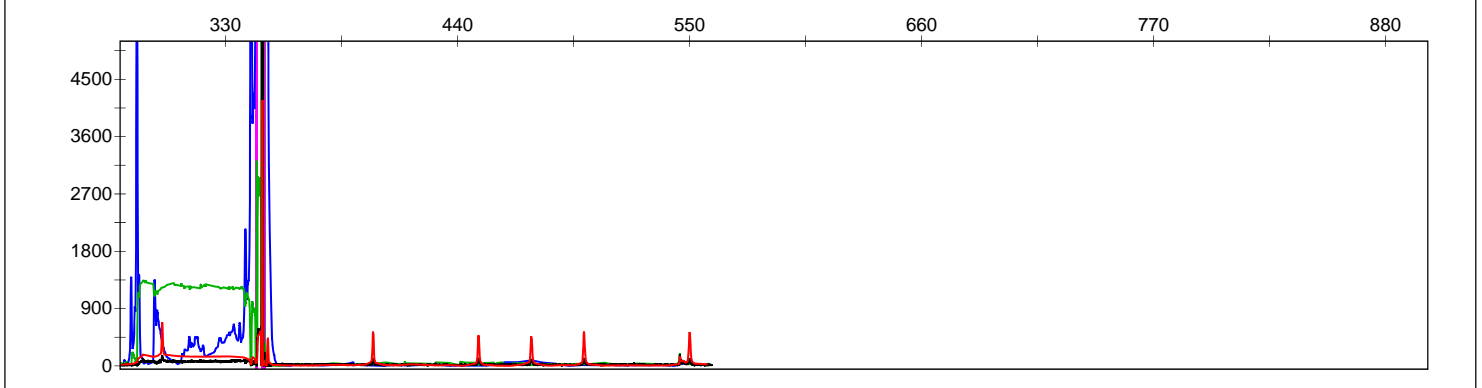

| Sample File      | Sample Name | Panel       | OS | SQ |
|------------------|-------------|-------------|----|----|
| 7-95-N68 G12.fsa | 7-95-N68    | R62 150-550 | ▲  | ■  |

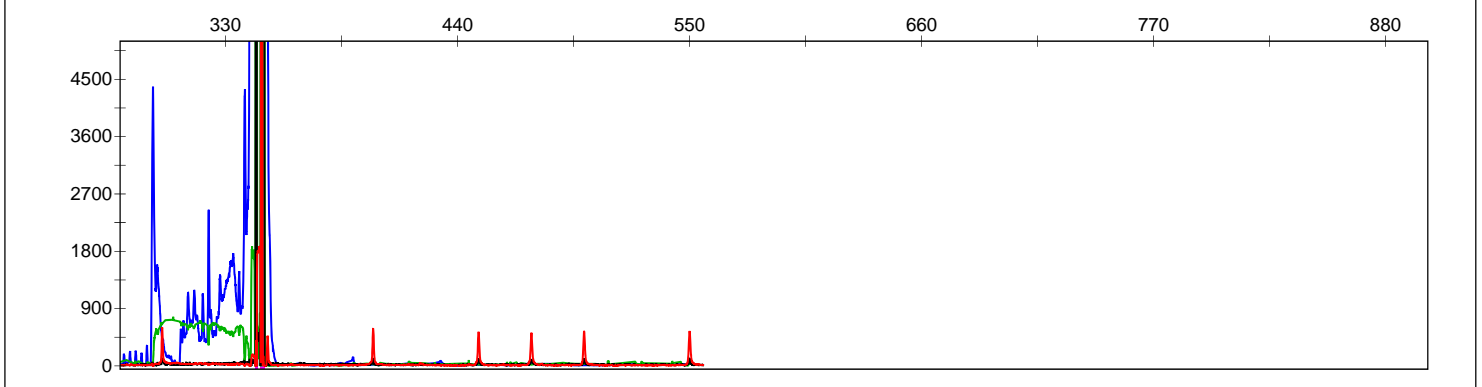

| Sample File      | Sample Name | Panel       | OS | SQ |
|------------------|-------------|-------------|----|----|
| 7-96-R62 H12.fsa | 7-96-R62    | R62 150-550 | ▲  | ■  |

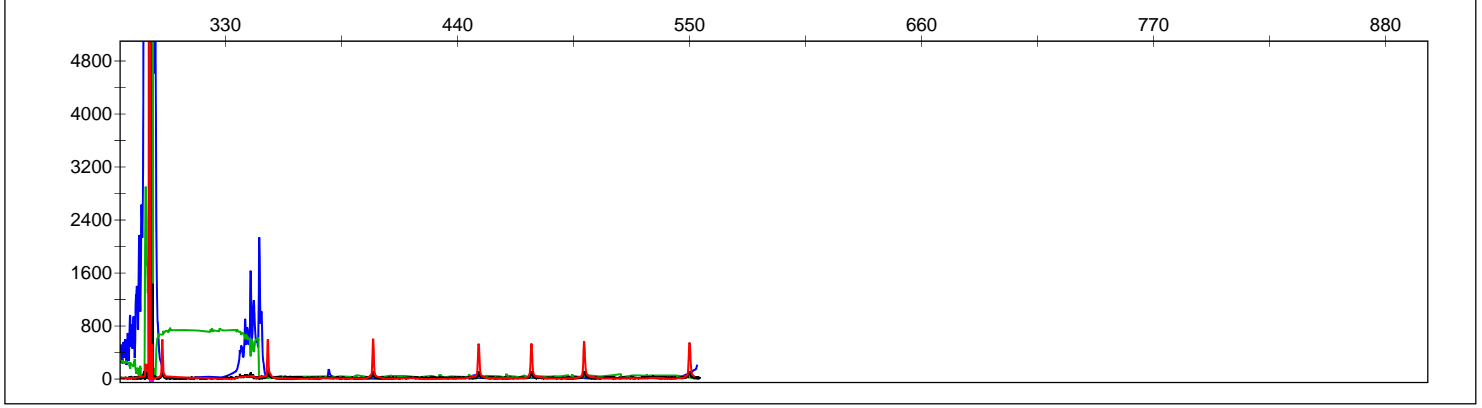

Supplement: pnas.1808377115.sd01.pdf [file pnas.1808377115.sd01.pdf]
